# Supplementary material
Source: Royal Society of Chemistry journal article supplement (doi:10.1039/d6cc00738d)
Supplement: d6cc00738d1.pdf [file d6cc00738d1.pdf]

**Supporting Information for**  
**Multi-colour and red emissions from a small donor-acceptor**  
**molecule by breaching Kasha's rule**

**Prathaban G,<sup>a</sup> Akanksha Sharma,<sup>b</sup> Soumen De,<sup>b</sup> and Susnata Pramanik<sup>\*a</sup>**

<sup>a</sup>Faculty of Engineering and Technology, Department of Chemistry, SRM  
Institution of Science and Technology (SRMIST), Kattankulathur 603203,  
India. gmail : [susmatap@srmist.edu.in](mailto:susmatap@srmist.edu.in)

<sup>b</sup>School of Chemistry, Indian Institute of Science Education and Research (IISER),  
Thiruvananthapuram, Kerala 695551, India.

## Table of contents

|                                                         |           |
|---------------------------------------------------------|-----------|
| <b>1. General remarks</b>                               | <b>3</b>  |
| <b>2. Synthetic methods</b>                             | <b>3</b>  |
| 2.1 Synthetic procedure for 5-Nitro acenaphthaquinone   | 3         |
| 2.2 Synthetic procedure for 5-Methoxy acenaphthoquinone | 4         |
| 2.3 Synthetic procedure for Compound 1                  | 4         |
| 2.4 Synthetic procedure for Compound 2                  | 5         |
| 2.5 Synthetic procedure for Compound 3                  | 6         |
| <b>3. NMR &amp; HRMS Characterization</b>               | <b>7</b>  |
| <b>4. HPLC Analysis</b>                                 | <b>10</b> |
| <b>5. Photophysical studies</b>                         | <b>12</b> |
| <b>6. Lifetime measurements</b>                         | <b>23</b> |
| <b>7. Quantum yield Measurements:</b>                   | <b>24</b> |
| <b>8. Crystallographic Information</b>                  | <b>31</b> |
| <b>9. DFT Calculation</b>                               | <b>35</b> |
| 9.1 Compound 1 Gaussian optimization                    | 36        |
| 9.2 Compound 2 Gaussian optimization                    | 40        |
| 9.3 Compound 3 Gaussian optimization                    | 45        |

## 1. General remarks

All glassware is cleaned and dried before use. Chemicals were purchased from TCL, Avra, and SRL and utilized without further purification. Thin-layer chromatography was performed on TLC Silica gel 60 F<sub>254</sub> (2x4 cm). Silica gel (100-200 mesh) was used for column chromatography. NMR Bruker Avance Neo (500 MHz) spectrometer was used to record the NMR spectra. <sup>1</sup>H NMR (500MHz) and <sup>13</sup>C NMR (101 MHz) chemical shifts were measured relative to SiMe<sub>4</sub> and CDCl<sub>3</sub>, using the chemical shift of the residual solvent peaks as references (SiMe<sub>4</sub>: δ 0 ppm). In NMR, the signal multiplicities are denoted by the letters s, d, m, dd, and t, which stand for singlet, doublet, multiplet, doublet of doublet, and triplet, respectively. High-resolution mass spectra (HR-MS) were recorded using an Agilent Technologies 6230 Q-TOF LC/MS system with Electrospray Ionization (ESI). HPLC data were collected in an Agilent 1260 Infinity HPLC using pure acetonitrile as eluent and C-18 column. UV analysis was performed on Carry 60 UV-Vis instrument from Agilent using HPLC grade solvents. Fluorescence spectra were recorded in Edinburg Instruments FLS 1000. The fluorescence decay curve and quantum yield were collected on the Edinburg Instruments FLS 1000 spectrofluorometer. Single crystal X-ray diffraction analysis was done using a Bruker D8 Quest X-ray diffractometer with Mo Kα (λ = 0.71073 Å) radiation. All theoretical calculations were performed using Gaussian 16, Revision A.03. The time-dependent density functional theory (TDDFT) calculations of the excitation energies were calculated at the optimized geometries of the ground states.

## 2. Synthetic methods

### 2.1 Synthetic procedure for 5-Nitro acenaphthaquinone<sup>i</sup>

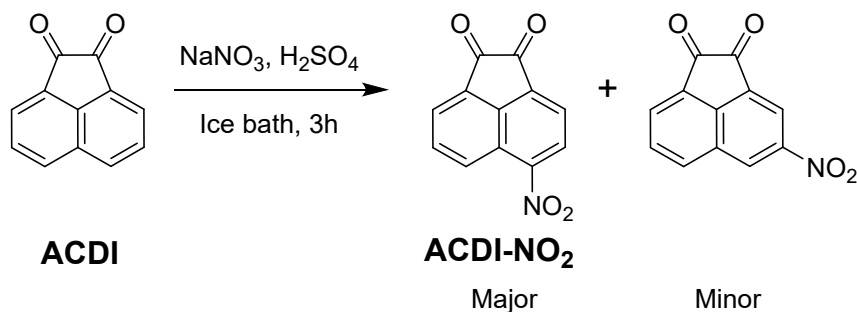

**Scheme S1.** Synthetic scheme of 5-Nitroacenaphthaquinone.

Acenaphthoquinone (1.00 g, 5.48 mmol), and NaNO<sub>3</sub> (513 mg, 6.03 mmol), were taken in RB flask and placed in an ice bath. Conc. H<sub>2</sub>SO<sub>4</sub> (10 mL) was slowly added with constant stirring. After the addition, the reaction is stirred for 3 h at room temperature. Then, the reaction mixture was slowly transferred into crushed ice. The formed precipitates were filtered and washed with water and purified by column chromatography using Ethyl acetate/hexane (30%:70%, v/v) as the eluent. Subsequently, recrystallized from dichloromethane. Yellow needle-like crystals were obtained (60% yield).

## 2.2 Synthetic procedure for 5-Methoxy acenaphthoquinone<sup>i</sup>

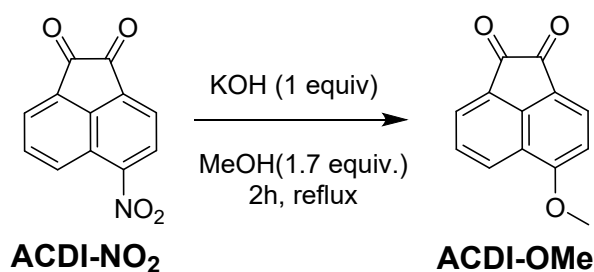

**Scheme S2.** Synthetic scheme of 5- Methoxy acenaphthoquinone.

5-Nitroacenaphthoquinone (300 mg, 1 equiv., 1.32 mmol), KOH (75 mg, 1 equiv., 1.32 mmol), were dissolved in 10 mL of Methanol and refluxed for 2 h. The solvent was removed, and the crude product was purified by column chromatography using Ethyl acetate/hexane (50%:50%, v/v) as the eluent. Light yellow powder obtained (60% yield).

## 2.3 Synthetic procedure for Compound 1

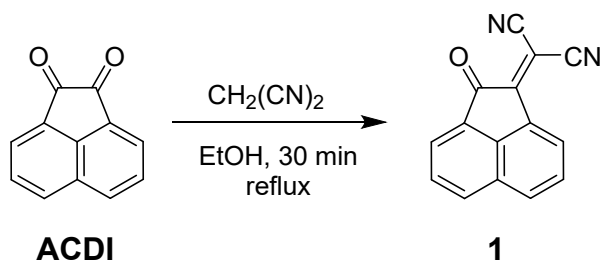

**Scheme S3.** Synthetic scheme of Compound 1

Acenaphthoquinone (300 mg, 1 equiv., 1.64 mmol) and malononitrile (152 mg, 1.2 equiv., 1.97 mmol) were dissolved in 10 mL of ethanol and refluxed for 30 minutes. The obtained precipitate was filtered and washed with cold ethanol and recrystallized from dichloromethane. Red plate crystals obtained.

**Yield: 85%.** Melting point: 232-238 °C. <sup>1</sup>H NMR (500 MHz, 298 K, CDCl<sub>3</sub>) δ 8.59 (d, *J* = 7.5 Hz, 1H), 8.26 (dd, *J* = 2.0 Hz, *J* = 8.5 Hz, 2H), 8.18 (d, *J* = 7.0 Hz, 1H), 7.90 – 7.86 (m, 2H). <sup>13</sup>C NMR (126 MHz, 298 K, CDCl<sub>3</sub>) δ 185.9, 155.3, 142.9, 132.5, 132.3, 130.6, 129.3, 129.2, 129.1, 128.4, 124.6, 123.8, 112.6, 110.8, 81.7. ESI-HRMS: *m/z* (%): 231.0549 ([C<sub>15</sub>H<sub>6</sub>N<sub>2</sub>O•H]<sup>+</sup>), calcd. *m/z* = 231.0553. Elemental analysis: C: 78.26; H: 2.63; N: 12.17 found C: 78.22; H: 2.56; N: 12.09.

#### 2.4 Synthetic procedure for Compound 2

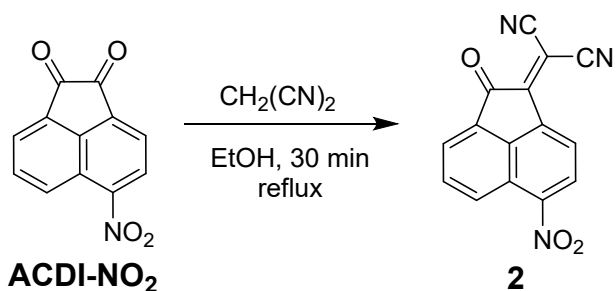

**Scheme S4.** Synthetic scheme of Compound 2.

5-Nitroacenaphthoquinone (300 mg, 1.32 mmol), and malononitrile (175 mg, 2.64 mmol) were dissolved in 10 mL of ethanol, and refluxed for 30 minutes. The obtained precipitates were filtered, washed in cold ethanol, and dried. Yellow powder obtained.

**Yield: 82%.** Melting point: 241-255 °C. <sup>1</sup>H NMR (500 MHz, 298 K, CDCl<sub>3</sub>) δ 9.14 (d, *J* = 8.0 Hz, 1H), 8.76 (d, *J* = 8.0 Hz, 1H), 8.71 (d, *J* = 8.0 Hz, 1H), 8.35 (d, *J* = 7.0 Hz, 1H), 8.18 (t, *J* = 8.0 Hz, 1H). ESI-HRMS: *m/z* (%): 275.0336 ([C<sub>15</sub>H<sub>5</sub>N<sub>3</sub>O<sub>3</sub>]<sup>+</sup>), calcd. *m/z* = 275.0331. Elemental analysis: C: 65.46; H: 1.83; N: 15.27 found C: 65.31; H: 1.78; N: 15.25. <sup>13</sup>C cannot be measured due to poor solubility.

## 2.5 Synthetic procedure for Compound 3

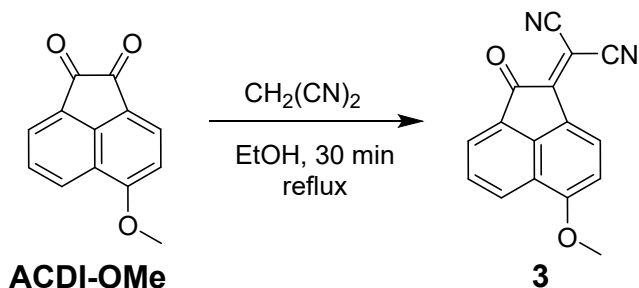

**Scheme S5.** Synthetic scheme of compound 3.

5-Methoxy acenaphthoquinone (300 mg, 1.41 mmol) and malononitrile (186 mg, 2.83 mmol) were dissolved in 10 mL ethanol and refluxed for 30 minutes. The obtained precipitate was filtered and washed with cold ethanol, purified by column chromatography using ethyl acetate/hexane (30%:70%, v/v) as the eluent, and recrystallized from ethyl acetate. Reddish brown crystals were obtained.

**Yield: 30%.** Melting point: 236-245 °C.  $^1\text{H}$  NMR (500 MHz, 298 K,  $\text{CDCl}_3$ )  $\delta$  8.57 (d,  $J = 8.5$  Hz, 1H), 8.41 (d,  $J = 8.5$  Hz, 1H), 8.13 (d,  $J = 7.5$  Hz, 1H), 7.80 (t,  $J = 7.5$  Hz, 1H), 7.14 (d,  $J = 8.5$  Hz, 1H), 4.20 (s, 3H). ESI-HRMS:  $m/z$  (%): 261.0659 ( $[\text{C}_{16}\text{H}_8\text{N}_2\text{O}_2\cdot\text{H}]^+$ ), calcd.  $m/z = 261.0654$ . Elemental analysis: C: 73.84; H: 3.10; N: 10.76 found C: 73.79; H: 3.10; N: 10.75.  $^{13}\text{C}$  cannot be measured due to poor solubility.

Please note that the range of melting points for compounds 2 and 3 is high. We observed isomeric impurity (2.4%) in compound 2 which was not possible to isolate due to similar polarity. The presence of impurity can lead to such a high range in melting points. However, we did not observe any impurity in 3. Therefore, the observed range can be attributed to the highly amorphous nature of compound 3.

### 3. NMR & HRMS Characterization

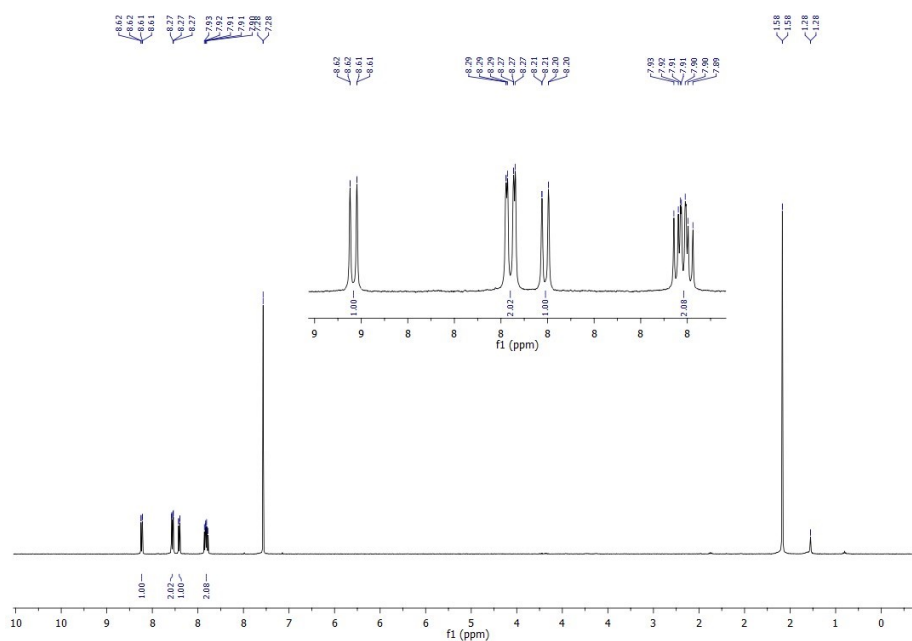

**Figure S1.** <sup>1</sup>H NMR (500 MHz, CDCl<sub>3</sub>, 298 K) spectrum of compound **1**. The inset shows the zoomed-in version of the aromatic region.

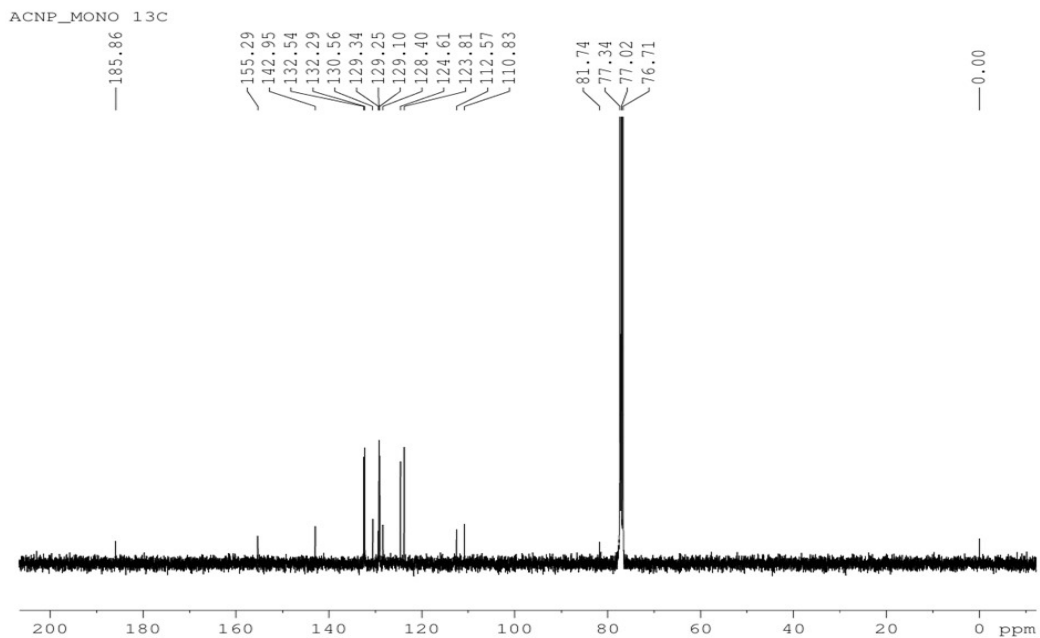

**Figure S2.**  $^{13}\text{C}$  NMR (126 MHz,  $\text{CDCl}_3$ , 298 K) spectrum of compound **1**.

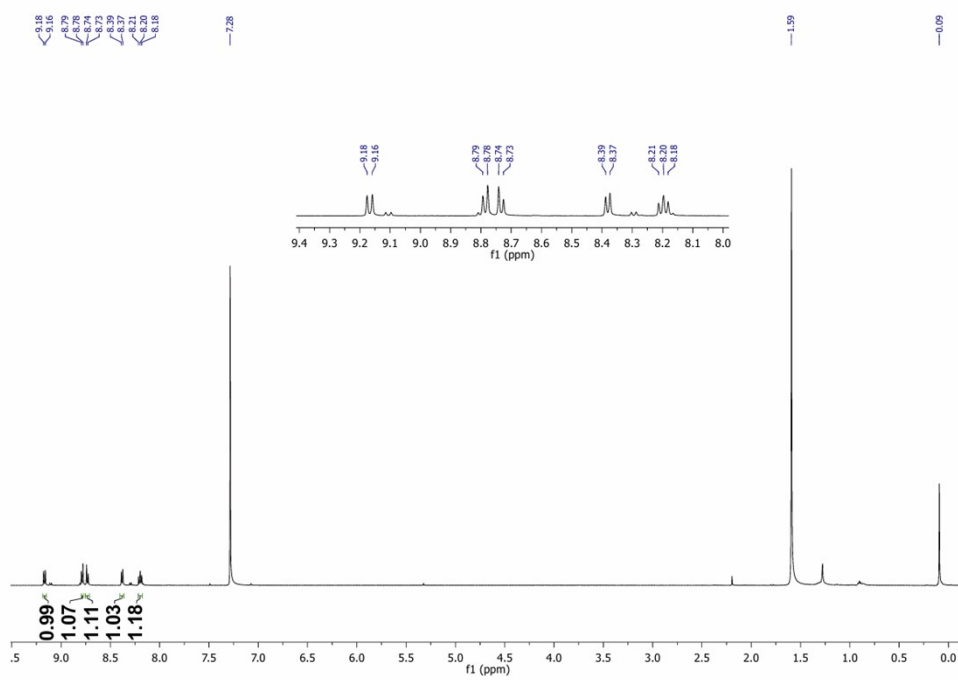

**Figure S3.**  $^1\text{H}$  NMR (500 MHz,  $\text{CDCl}_3$ , 298 K) spectrum of compound **2**. The inset shows the zoomed-in version of the aromatic region.

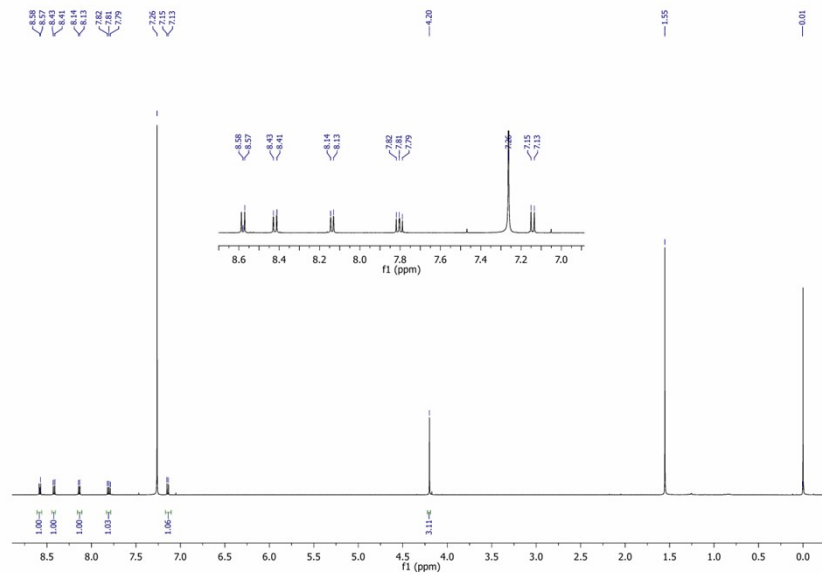

**Figure S4.**  $^1\text{H}$  NMR (500 MHz,  $\text{CDCl}_3$ , 298 K) spectrum of compound **3**. The inset shows the zoomed-in version of the aromatic region.

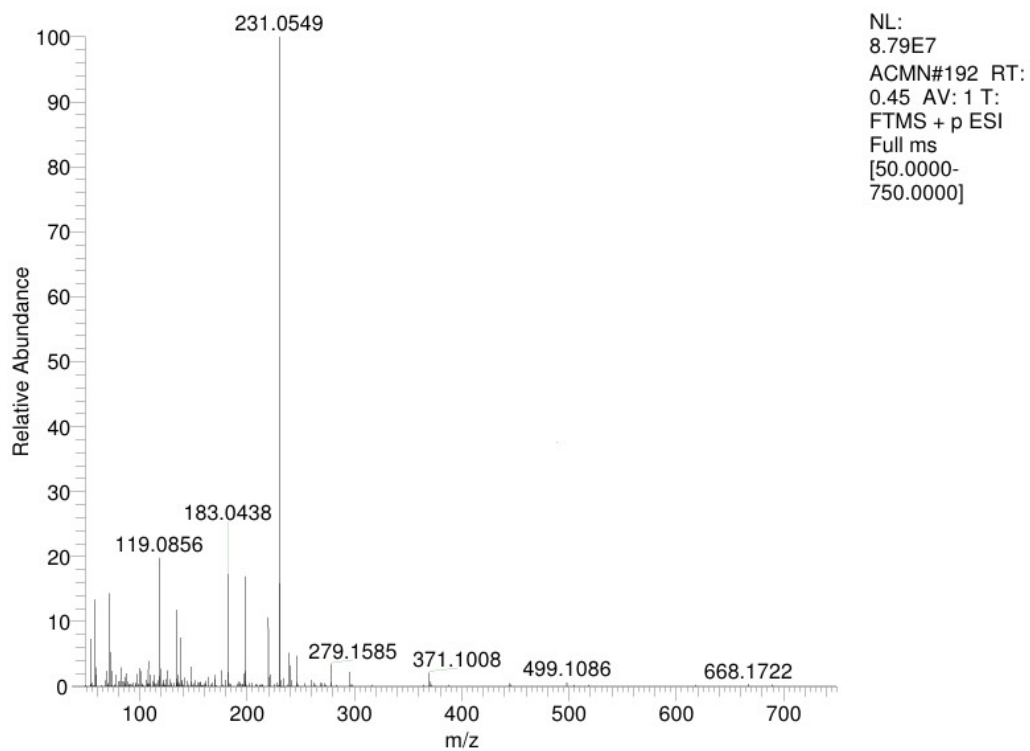

**Figure S5.** ESI-HRMS spectrum of compound **1**.

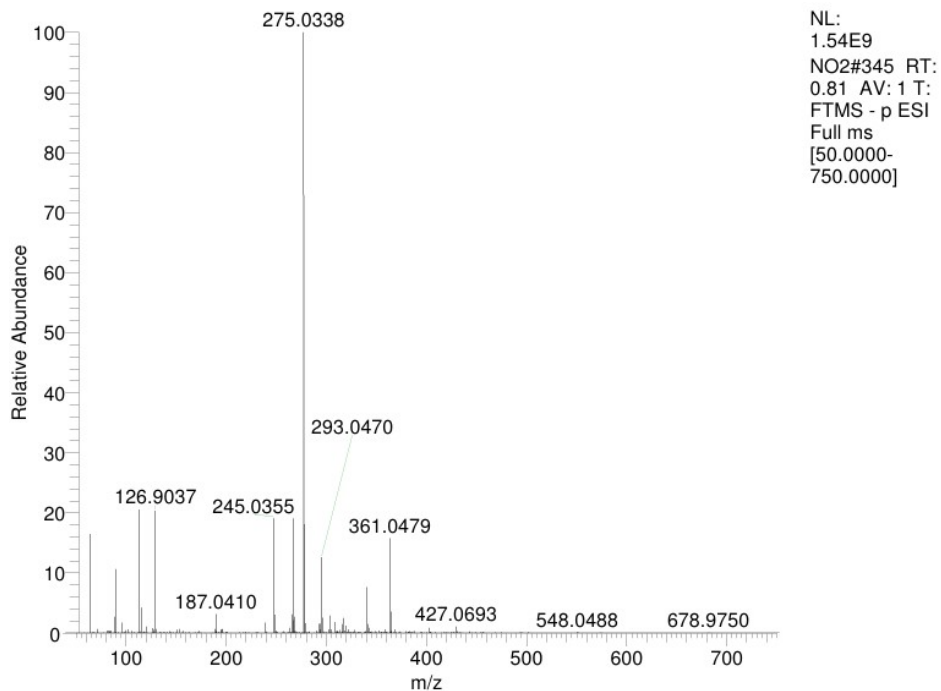

**Figure S6.** ESI-HRMS spectrum of compound **2**.

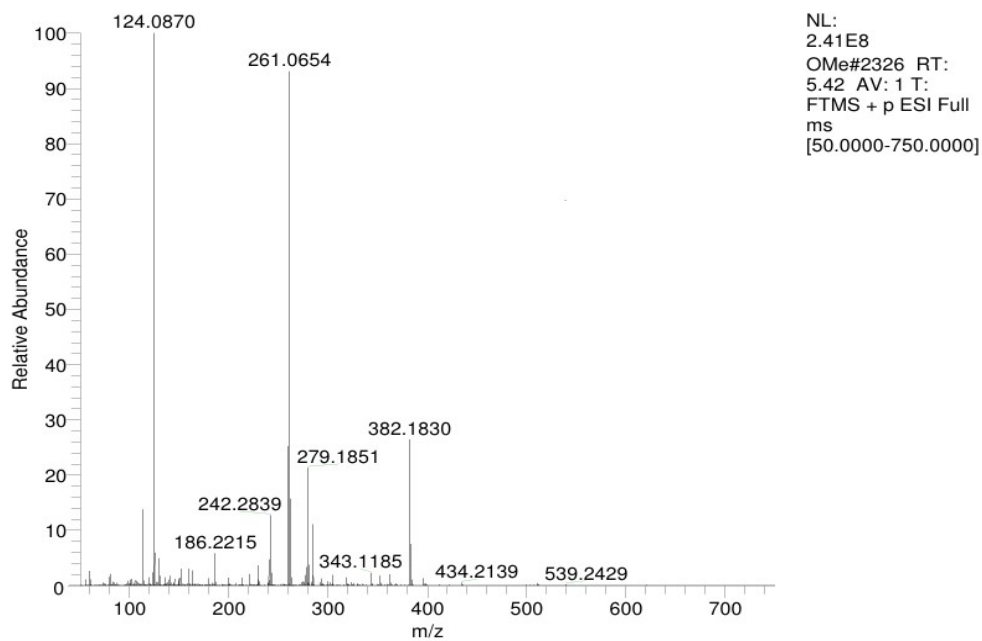

**Figure S7.** ESI-HRMS spectrum of compound **3**.

#### 4. HPLC Analysis

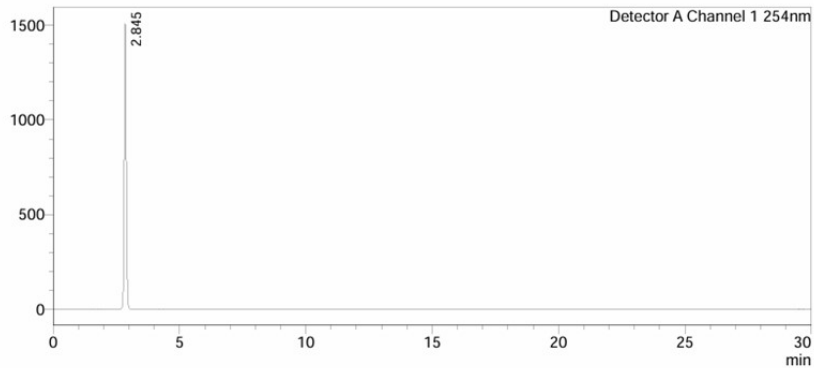

Detector A Channel 1 254nm

| Ret. Time | Area    | Height  | Area%   |
|-----------|---------|---------|---------|
| 2.845     | 8452140 | 1508582 | 100.000 |
|           | 8452140 | 1508582 | 100.000 |

**Figure S8.** Reverse-phase HPLC chromatogram of compound **1** using acetonitrile as the mobile phase. (HPLC condition: CH<sub>3</sub>CN, 30 min, flow rate = 1.0 mL/min, wavelength = 254 nm).

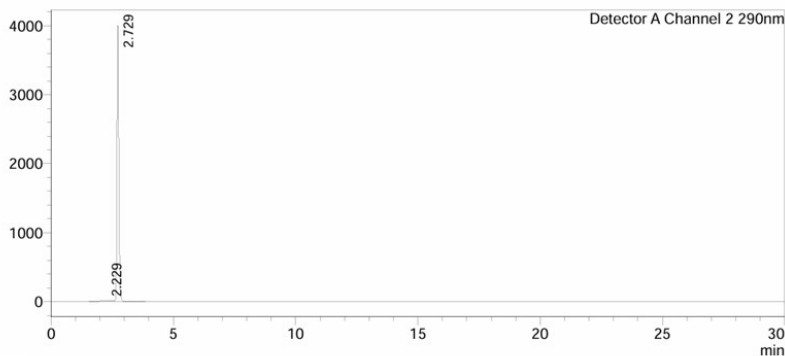

Detector A Channel 2 290nm

| Ret. Time | Area     | Height  | Area%   |
|-----------|----------|---------|---------|
| 2.229     | 497453   | 18394   | 2.444   |
| 2.729     | 19853123 | 3999958 | 97.556  |
|           | 20350576 | 4018352 | 100.000 |

**Figure S9.** Reverse-phase HPLC chromatogram of compound **2** using acetonitrile as the mobile phase. Roughly 2.4% impurity is possibly the other isomer of **2** under HPLC conditions. (HPLC condition: CH<sub>3</sub>CN, 30 min, flow rate = 1.0 mL/min, wavelength = 290 nm).

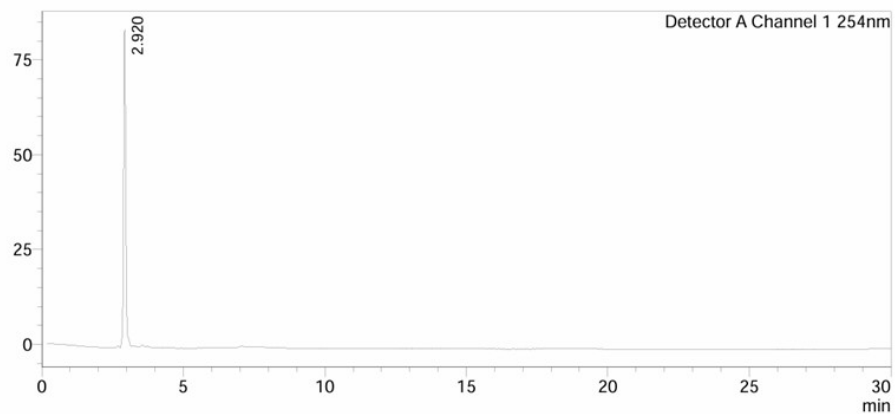

Detector A Channel 1 254nm

| Ret. Time | Area   | Height | Area%   |
|-----------|--------|--------|---------|
| 2.920     | 447822 | 83971  | 100.000 |
|           | 447822 | 83971  | 100.000 |

**Figure S10.** Reverse-phase HPLC chromatogram of compound **3** using acetonitrile as the mobile phase. (HPLC condition: CH<sub>3</sub>CN, 30 min, flow rate = 1.0 mL/min, wavelength = 254 nm).

## 5. Photophysical studies

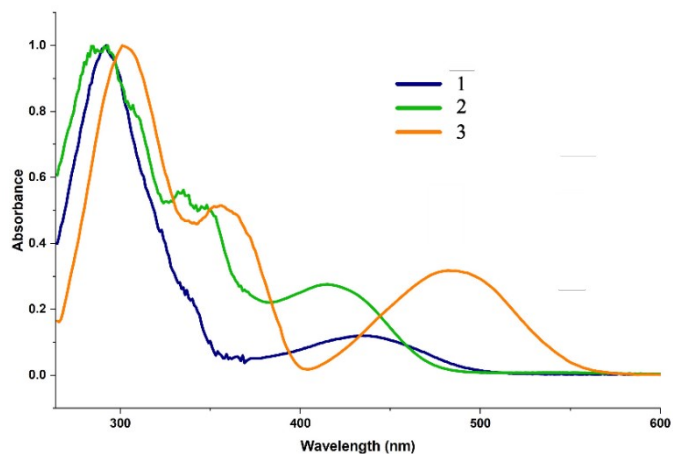

**Figure S11.** Normalized absorption spectra of compounds **1-3** in CH<sub>3</sub>CN ( $c = 10^{-5}$  M, 298 K).

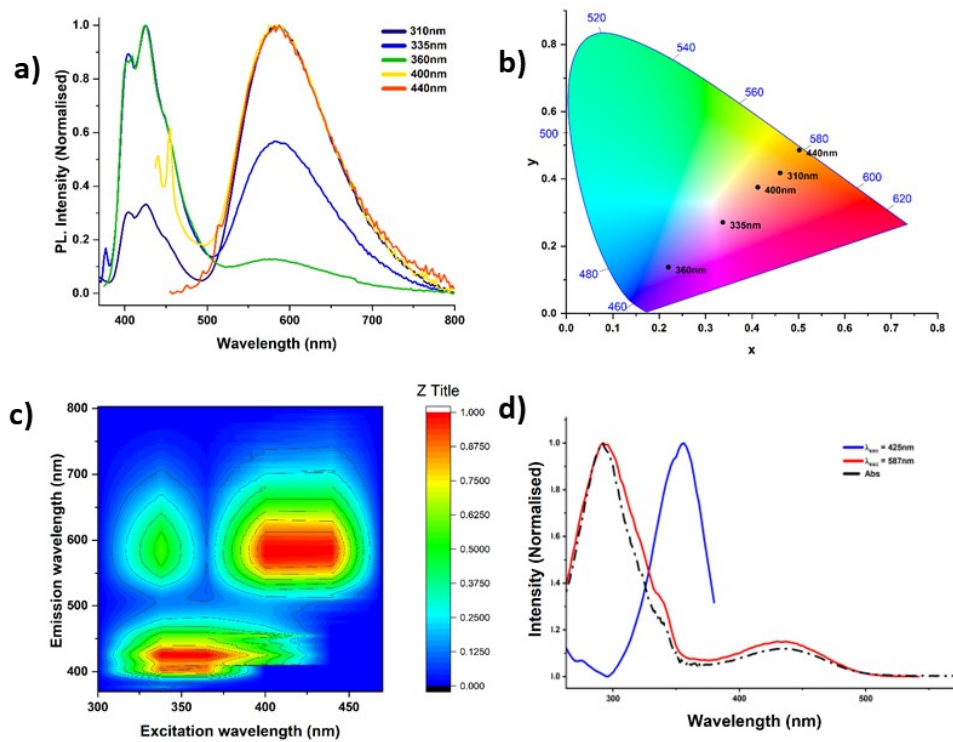

**Figure S12.** **a)** Excitation wavelength-dependent emission spectra of compound **1** in CH<sub>3</sub>CN at 298 K ( $c = 10^{-5}$  M); **b)** CIE plot of excitation wavelength-dependent emission; **c)** 2D-excitation-emission contour plot; **d)** Comparison of absorption and excitation spectra of emissions at 425 nm, 587 nm.

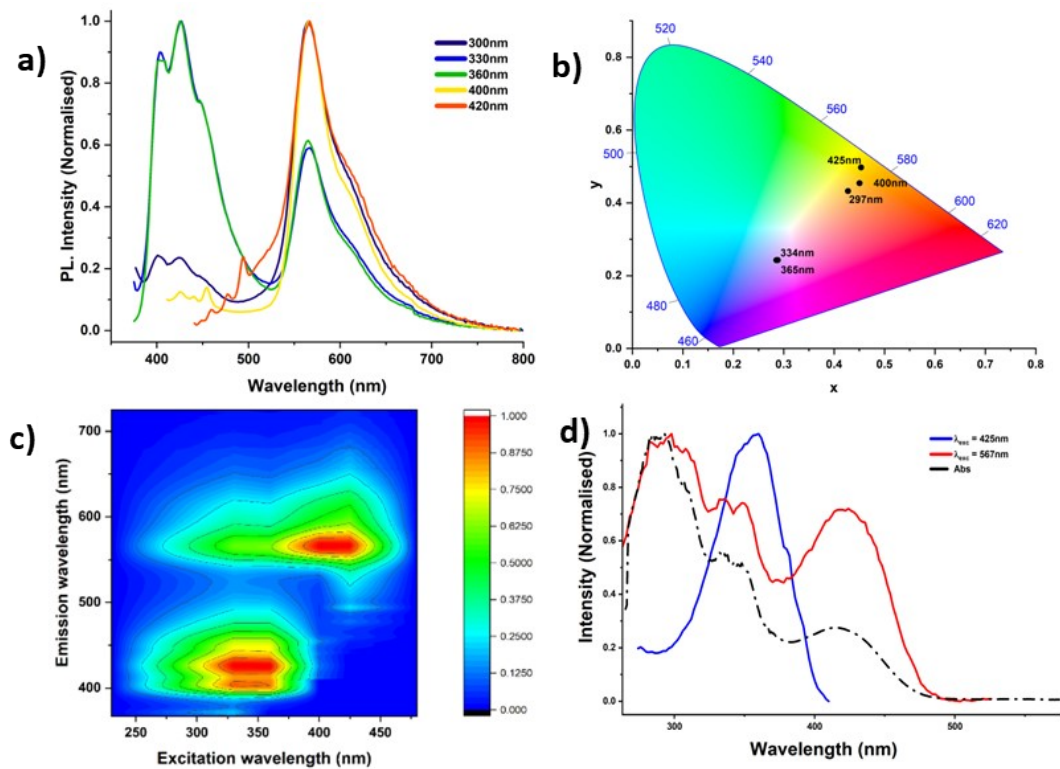

**Figure S13.** **a)** Excitation wavelength-dependent emission spectra of compound **2** in CH<sub>3</sub>CN at 298 K ( $c = 10^{-5}$  M); **b)** CIE plot of excitation wavelength-dependent emission; **c)** 2D-excitation-emission contour plot; **d)** Comparison of absorption and excitation spectra of emissions at 425 nm, 567 nm.

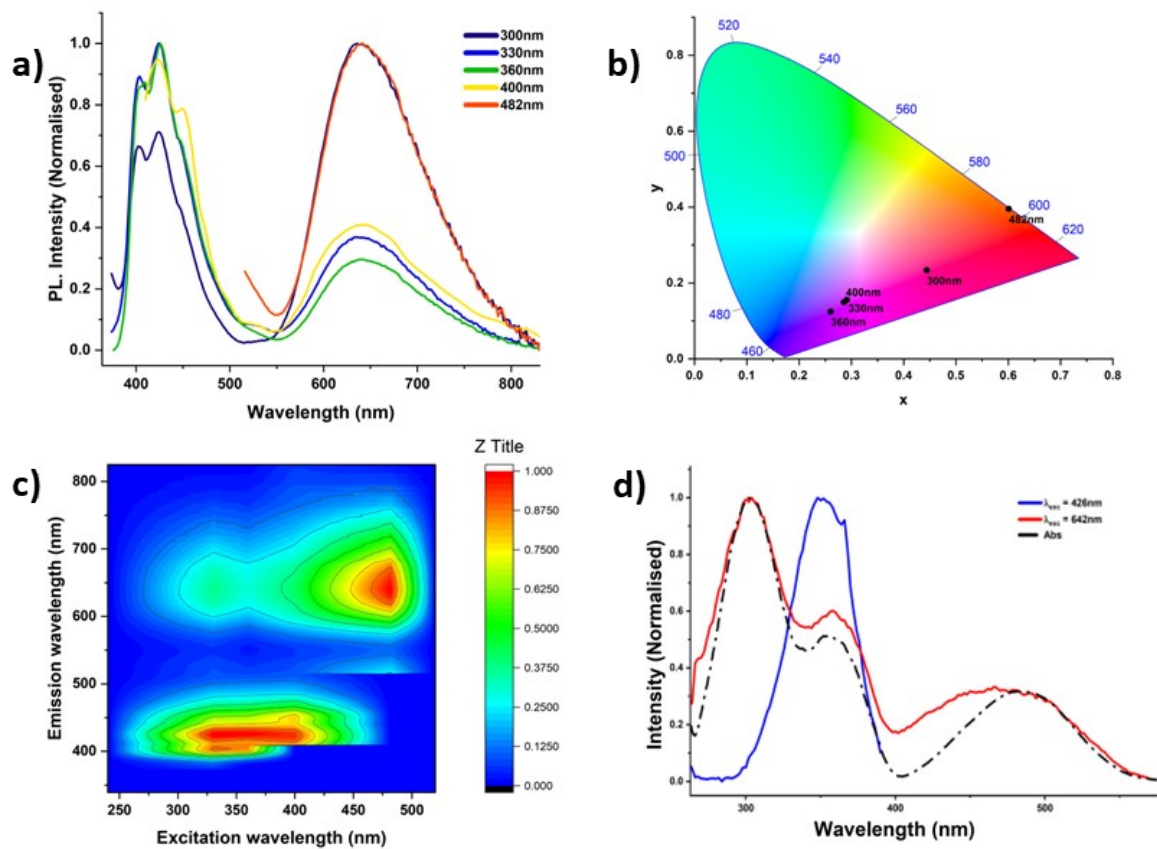

**Figure S14.** **a)** Excitation-dependent wavelength emission spectra of compound **3** in CH<sub>3</sub>CN at 298 K (*c* = 10<sup>-5</sup> M); **b)** CIE plot of excitation wavelength-dependent emission; **c)** 2D-excitation-emission contour plot; **d)** Comparison of absorption and excitation spectra of emissions at 426 nm, 642 nm.

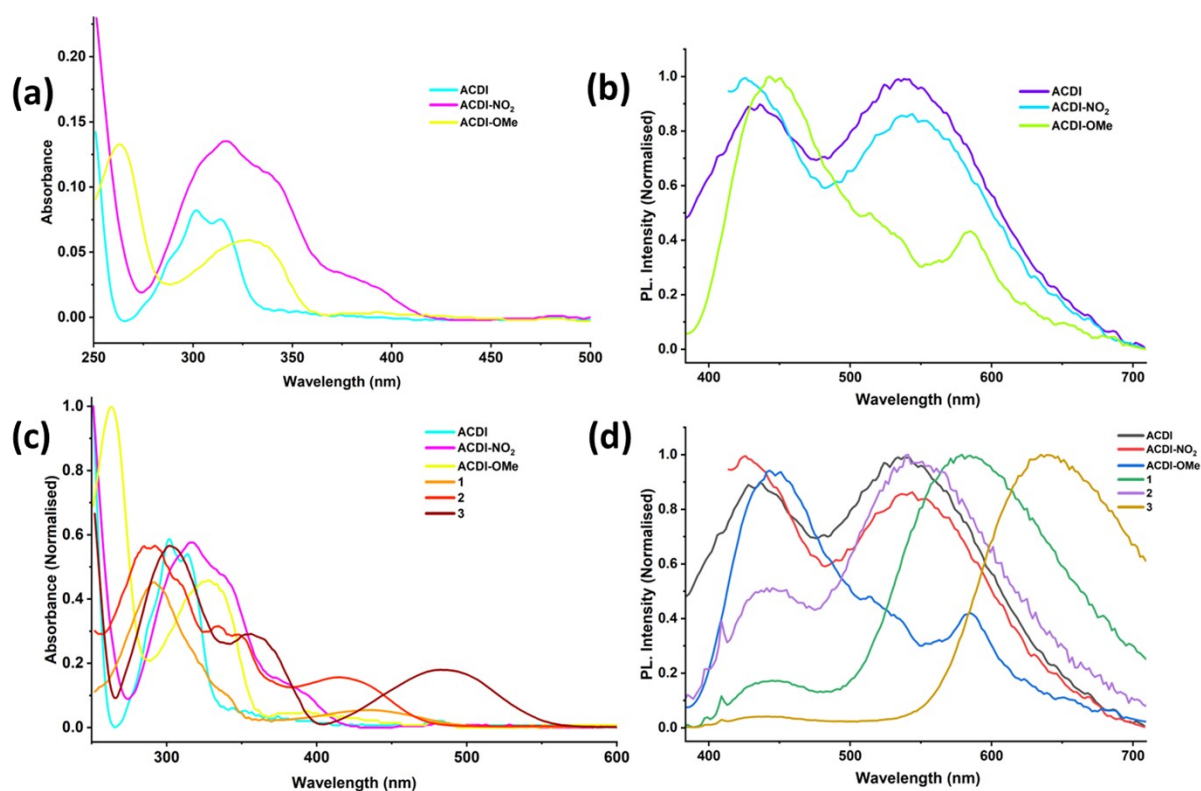

**Figure S15.** (a) Absorption spectra of precursors in acetonitrile; (b) Normalized emission spectra of precursors ( $\lambda_{\text{ex}} = \lambda_{\text{max}}$ ) and (c) Normalized absorption spectra of precursors and compounds **1–3**; (d) Normalized emission spectra of precursors and compounds **1–3** ( $c = 10^{-5}$  M), for precursors  $\lambda_{\text{ex}} = \lambda_{\text{max}}$  and for compounds **1–3**  $\lambda_{\text{ex}} = 365$  nm. All the measurements were performed in acetonitrile ( $c = 10^{-5}$  M) at 298 K.

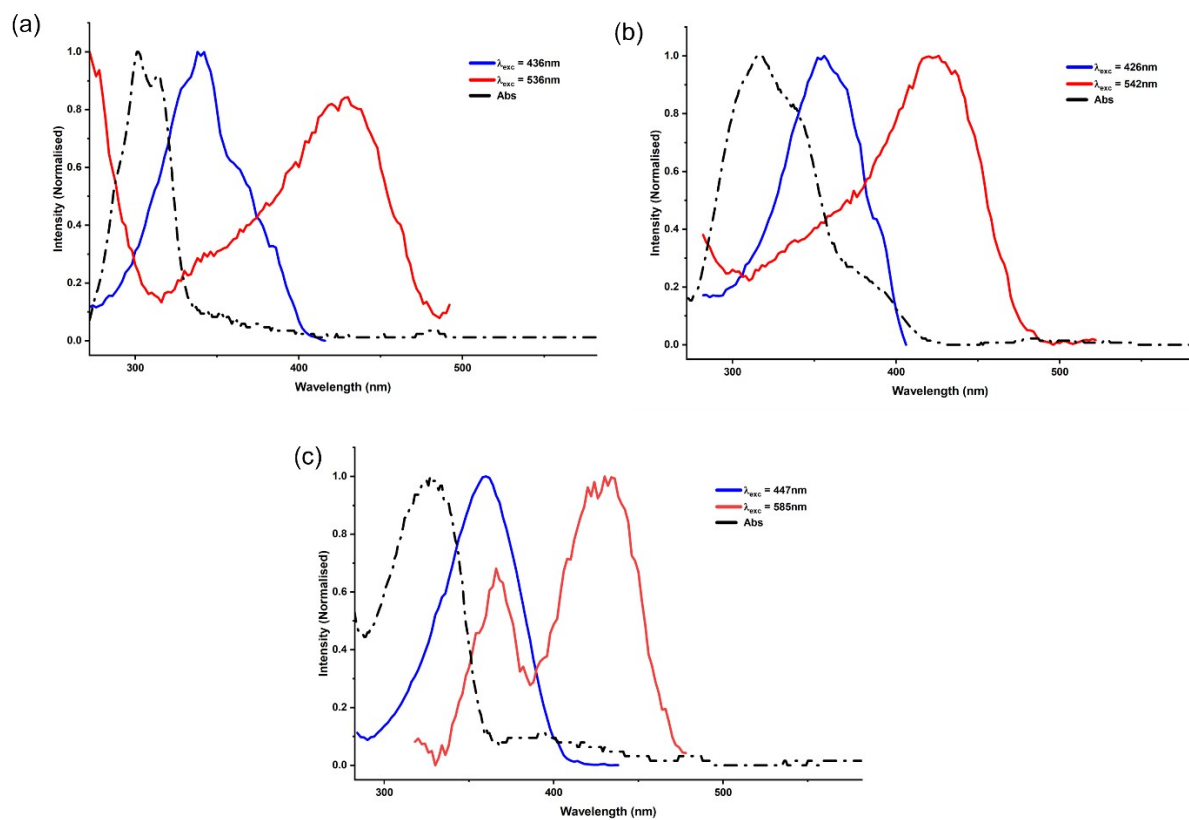

**Figure S16.** Normalized absorption and excitation spectra of precursors (a) **ACDI**; (b) **ACDI-NO<sub>2</sub>** and (c) **ACDI-OMe** in **CH<sub>3</sub>CN** ( $c = 10^{-5}$  M) at 298 K.

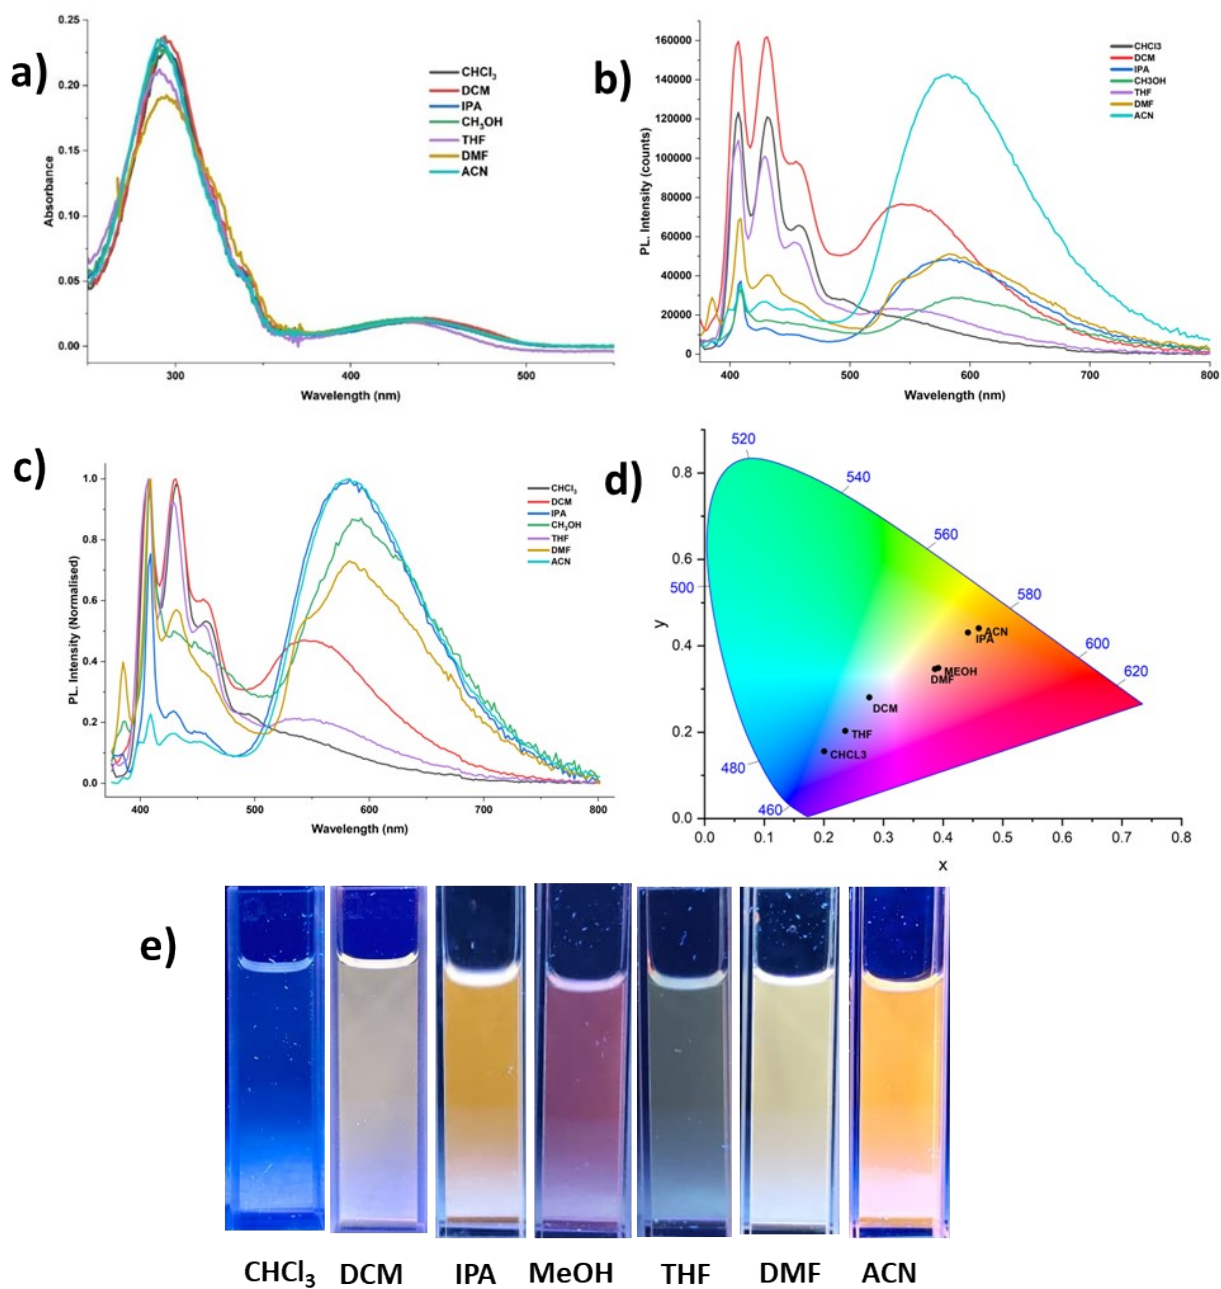

**Figure S17.** **a)** Absorption spectra of compound 1 (298 K) in different solvents ( $c = 10^{-5}$  M); **b)** Emission spectra in different solvents ( $\lambda_{\text{ex}} = 365$  nm); **c)** Normalized emission spectra; **d)** CIE plot; and **e)** Photographs of these solutions taken under 365 nm.

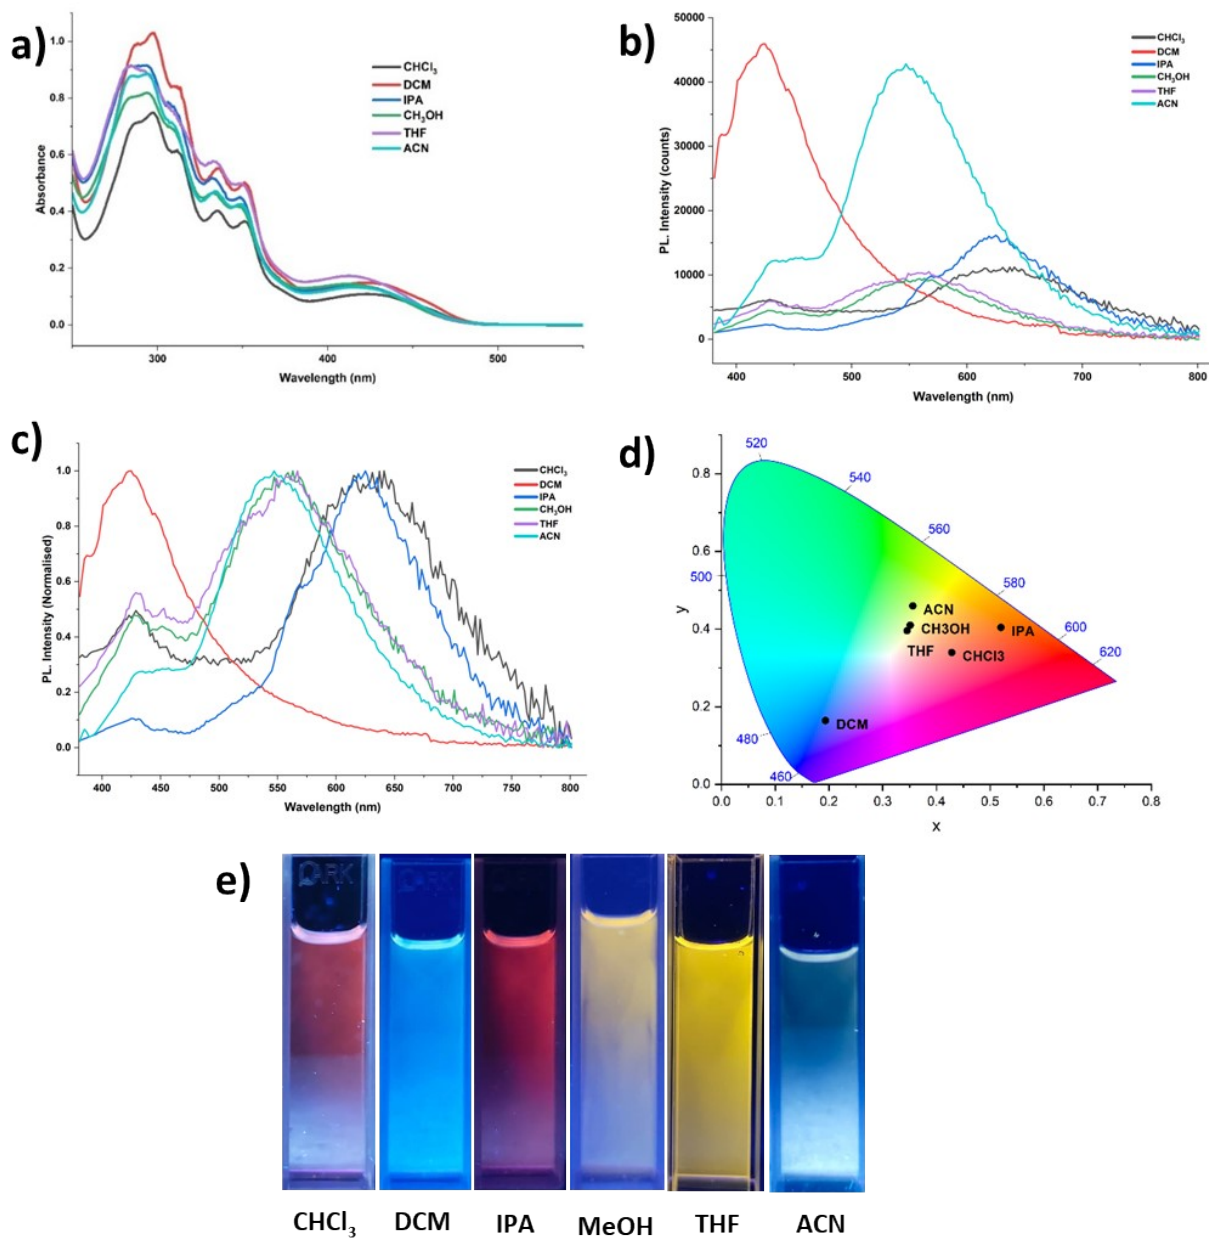

**Figure S18.** a) Absorption spectra of compound **2** (298 K) in different solvents ( $c = 10^{-5}$  M); b) Emission spectra in different solvents ( $\lambda_{\text{ex}} = 365$  nm); c) Normalized emission spectra; d) CIE plot; and e) Photographs of these solutions taken under 365 nm.

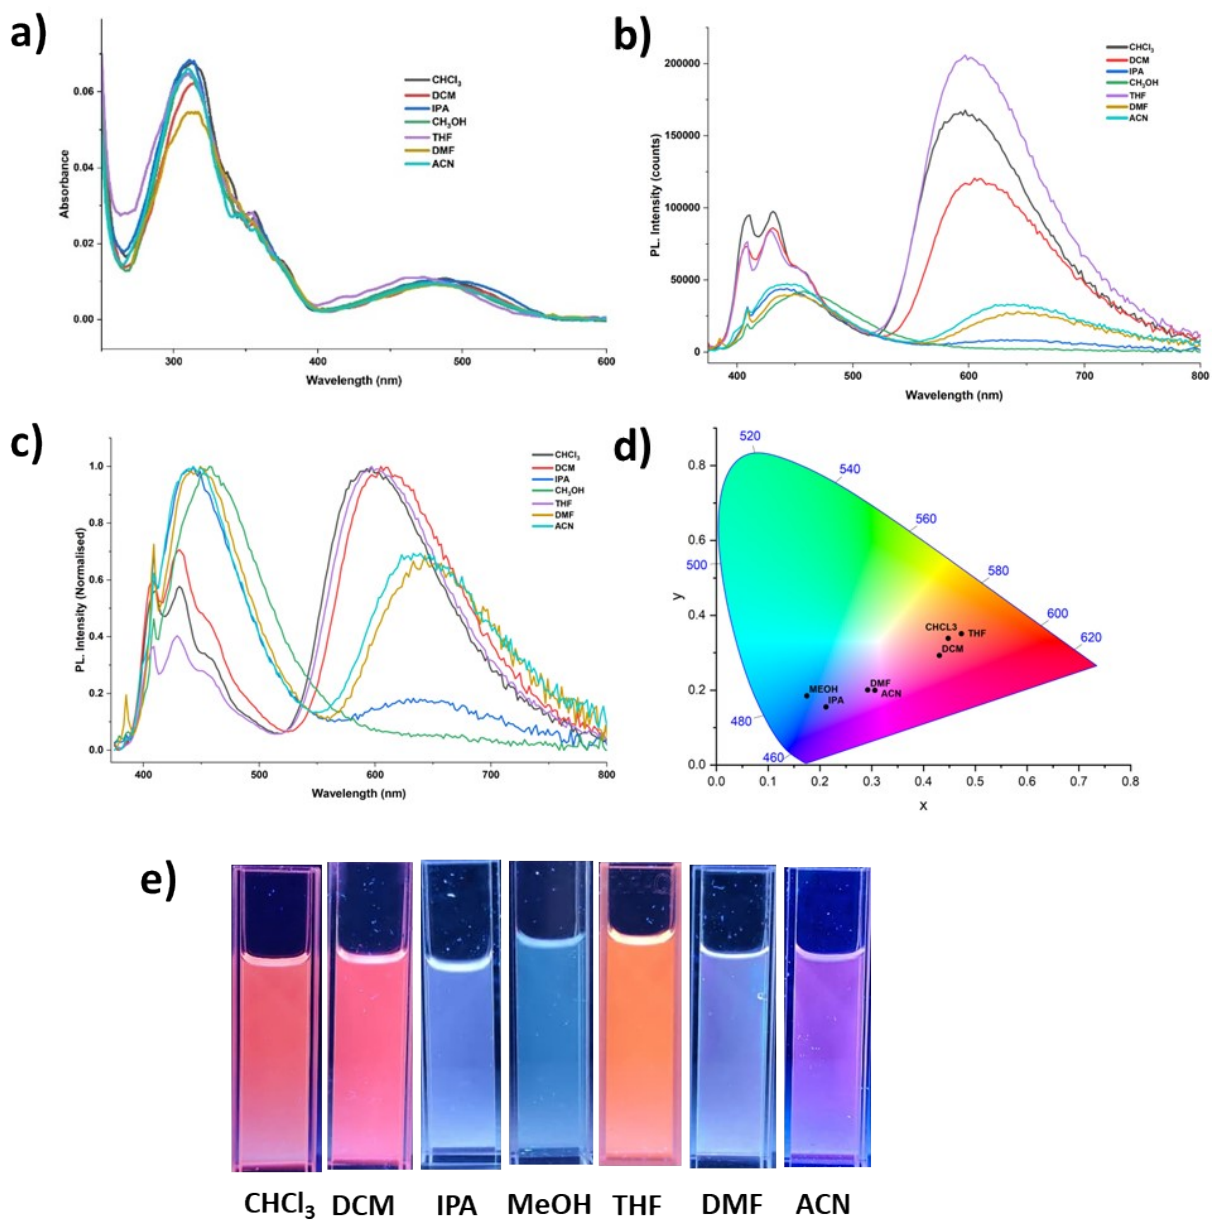

**Figure S19.** a) Absorption spectra of compound **3** (298 K) in different solvents ( $c = 5 \times 10^{-6}$  M); b) Emission spectra in different solvents ( $\lambda_{\text{ex}} = 365$  nm); c) Normalized emission spectra; d) CIE plot; e) Photographs of these solutions taken under 365 nm.

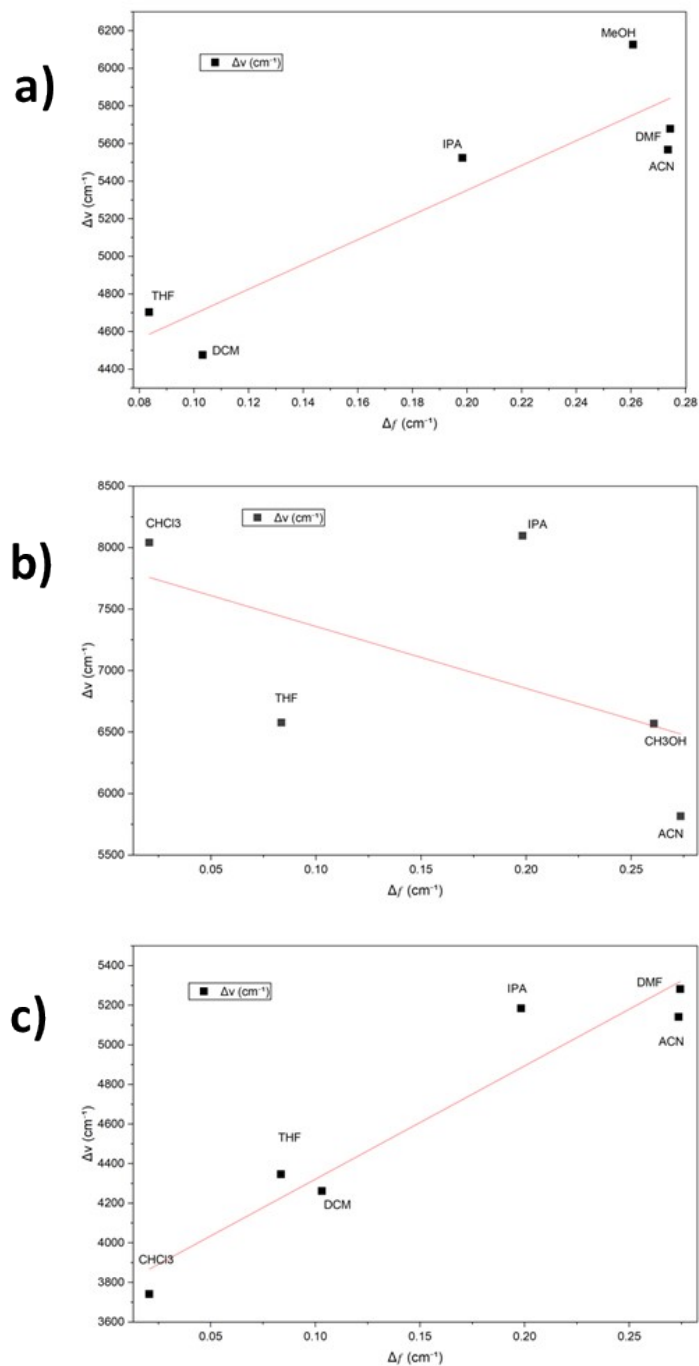

**Figure S20.** Lippert-Mataga plot of compounds a) 1, b) 2 and c) 3.

**Table S1.** Absorbance and emission maxima, and Stokes' shift data for compounds **1-3**, where absorbance maxima are represented as  $\lambda_{\text{abs}}$  in wavelength and  $\nu_{\text{abs}}$  in wavenumber, and emission maxima as  $\lambda_{\text{em}}$  in wavelength and  $\nu_{\text{em}}$  in wavenumber ( $\lambda_{\text{ex}} = \lambda_{\text{abs}}$ ).

| <b>Compound 1</b>       |                             |                            |                      |                                    |                                   |                                  |
|-------------------------|-----------------------------|----------------------------|----------------------|------------------------------------|-----------------------------------|----------------------------------|
| <b>Solvent</b>          | $\lambda_{\text{abs}}$ (nm) | $\lambda_{\text{em}}$ (nm) | $\Delta\lambda$ (nm) | $\nu_{\text{abs}}(\text{cm}^{-1})$ | $\nu_{\text{em}}(\text{cm}^{-1})$ | $\Delta\nu$ ( $\text{cm}^{-1}$ ) |
| <b>CHCl<sub>3</sub></b> | 443                         | -                          | -                    | 22573                              | -                                 | -                                |
| <b>DCM</b>              | 442                         | 543                        | 101                  | 22624                              | 18146                             | 4470                             |
| <b>IPA</b>              | 441                         | 583                        | 142                  | 22675                              | 17152                             | 5520                             |
| <b>CH<sub>3</sub>OH</b> | 435                         | 593                        | 158                  | 22988                              | 16863                             | 6130                             |
| <b>THF</b>              | 430                         | 539                        | 109                  | 23255                              | 18552                             | 4700                             |
| <b>DMF</b>              | 438                         | 583                        | 145                  | 22831                              | 17152                             | 5680                             |
| <b>ACN</b>              | 439                         | 581                        | 142                  | 22779                              | 17211                             | 5570                             |

| <b>Compound 2</b>       |                             |                            |                      |                                    |                                   |                                  |
|-------------------------|-----------------------------|----------------------------|----------------------|------------------------------------|-----------------------------------|----------------------------------|
| <b>Solvent</b>          | $\lambda_{\text{abs}}$ (nm) | $\lambda_{\text{em}}$ (nm) | $\Delta\lambda$ (nm) | $\nu_{\text{abs}}(\text{cm}^{-1})$ | $\nu_{\text{em}}(\text{cm}^{-1})$ | $\Delta\nu$ ( $\text{cm}^{-1}$ ) |
| <b>CHCl<sub>3</sub></b> | 423                         | 641                        | 218                  | 23640                              | 15600                             | 8040                             |
| <b>DCM</b>              | 423                         | -                          | -                    | 23640                              | -                                 | -                                |
| <b>IPA</b>              | 415                         | 625                        | 210                  | 24096                              | 16000                             | 8100                             |
| <b>CH<sub>3</sub>OH</b> | 411                         | 563                        | 152                  | 24330                              | 17761                             | 6570                             |
| <b>THF</b>              | 413                         | 567                        | 154                  | 24213                              | 17636                             | 6580                             |
| <b>ACN</b>              | 415                         | 547                        | 132                  | 24096                              | 18281                             | 5810                             |

| <b>Compound 3</b>       |                             |                            |                      |                                    |                                   |                                  |
|-------------------------|-----------------------------|----------------------------|----------------------|------------------------------------|-----------------------------------|----------------------------------|
| <b>Solvent</b>          | $\lambda_{\text{abs}}$ (nm) | $\lambda_{\text{em}}$ (nm) | $\Delta\lambda$ (nm) | $\nu_{\text{abs}}(\text{cm}^{-1})$ | $\nu_{\text{em}}(\text{cm}^{-1})$ | $\Delta\nu$ ( $\text{cm}^{-1}$ ) |
| <b>CHCl<sub>3</sub></b> | 488                         | 597                        | 109                  | 20491                              | 16750                             | 3740                             |
| <b>DCM</b>              | 481                         | 605                        | 124                  | 20790                              | 16528                             | 4260                             |
| <b>IPA</b>              | 480                         | 639                        | 159                  | 20833                              | 15649                             | 5180                             |
| <b>CH<sub>3</sub>OH</b> | 480                         | -                          | -                    | 20833                              | -                                 | -                                |
| <b>THF</b>              | 474                         | 597                        | 123                  | 21097                              | 16750                             | 4350                             |
| <b>DMF</b>              | 480                         | 643                        | 168                  | 20833                              | 15552                             | 5280                             |
| <b>ACN</b>              | 481                         | 639                        | 158                  | 20790                              | 15649                             | 5140                             |

## Fluorescence Studies in Thin Film

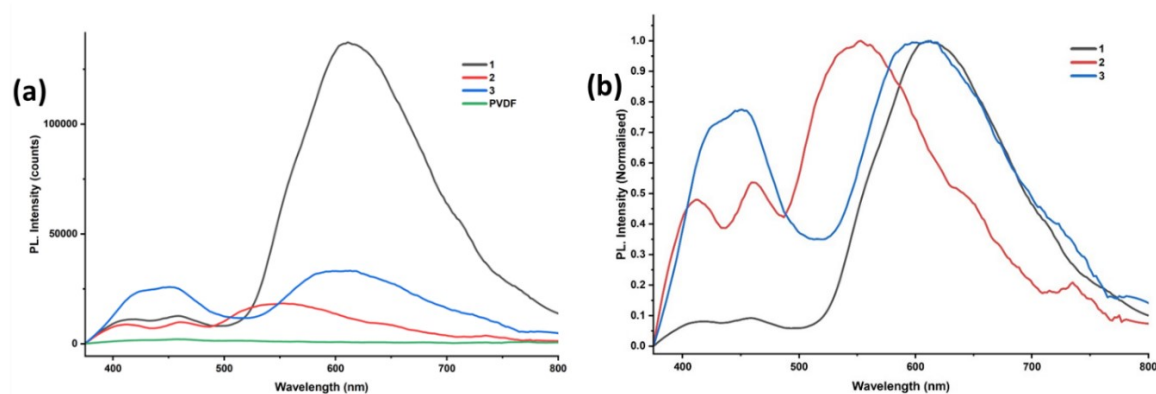

**Figure S21.** (a) Emission spectra of 5 wt% compounds in polyvinylidene fluoride (PVDF) thin film; (b) its normalized emission spectra, ( $\lambda_{\text{ex}} = 365 \text{ nm}$ ).

## Solid-state Fluorescence Studies

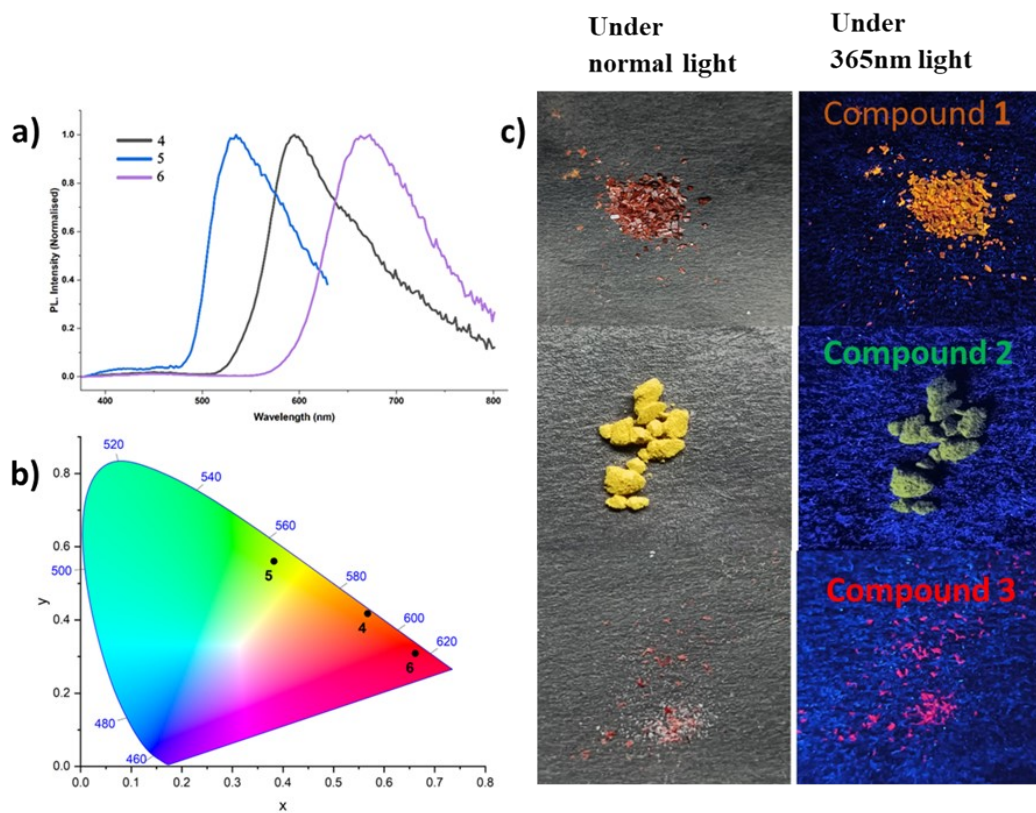

**Figure S22.** a) Solid-state emission spectra of compounds 1-3; b) its CIE plot; c) Photographs taken under normal light and 365 nm light ( $\lambda_{\text{ex}} = 365 \text{ nm}$ ). Although single emission band was

observed for all the compounds ( $\lambda_{ex} = 365$  nm) in their solid-state dual emissions were observed in thin film (Figure S21 and S22). In solid-state, strong intermolecular interactions facilitate rapid internal conversion from higher excited state, resulting emission from  $S_1$  state following Kasha's rule. In thin films, fluorophores are away from one another resulting in weak/no intermolecular interaction and thus, emission from higher excited state if feasible.

## 6. Lifetime measurements

**Table S2.** Lifetime data of compounds. The short wavelength emission peak was fitted with biexponential decay function, which is due to the presence of two emission bands, one from  $S_3$  and the other from  $S_1$ . However, the second emission band was fitted with single exponential decay function as it corresponds to single emission band. For short wavelength emission 380 nm laser pulse (10 ps) was used while for longer wavelength emission 480 nm laser pulse (ns) was employed.

| Compounds | Lifetime (short wavelength) |                       | Lifetime (longer wavelength) |
|-----------|-----------------------------|-----------------------|------------------------------|
|           | $\tau_1$ (ns)               | $\tau_2$ (ns)         | $\tau_1$ (ns)                |
| <b>1</b>  | $1.61 \pm 0.01$ (84%)       | $7.68 \pm 2.32$ (16%) | $5.37 \pm 0.10$ (100%)       |
| <b>2</b>  | $1.27 \pm 0.23$ (83%)       | $4.04 \pm 2.17$ (17%) | $1.67 \pm 0.04$ (100%)       |
| <b>3</b>  | $1.57 \pm 0.03$ (86%)       | $8.49 \pm 0.7$ (14%)  | $1.41 \pm 0.12$ (100%)       |

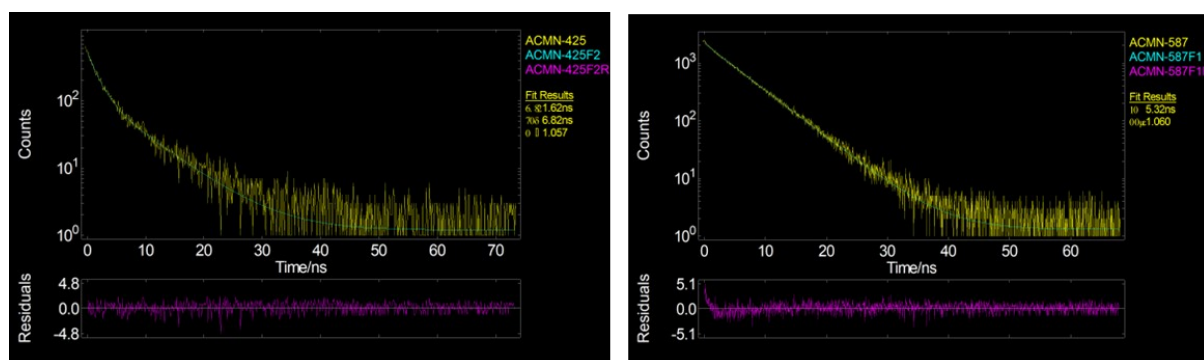

**Figure S23.** Lifetime plot of compound **1** (298 K) in  $\text{CH}_3\text{CN}$  ( $c = 10^{-5}$  M).

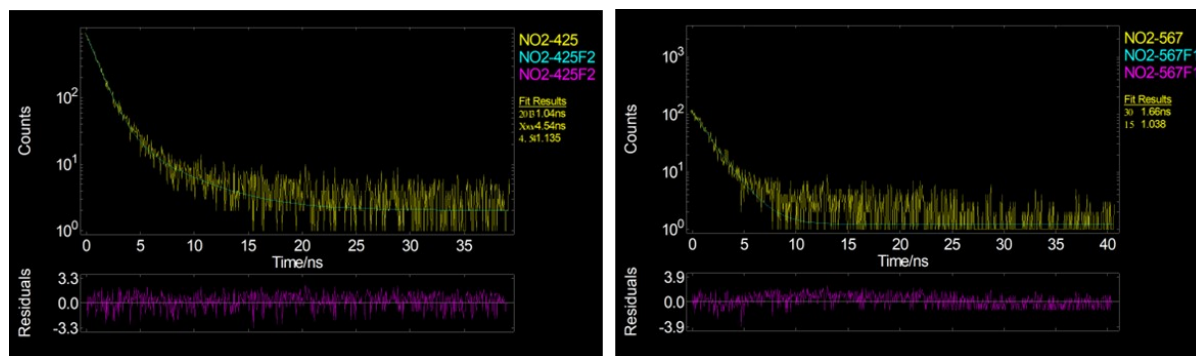

**Figure S24.** Lifetime plot of compound **2** (298 K) in CH<sub>3</sub>CN ( $c = 10^{-5}$  M).

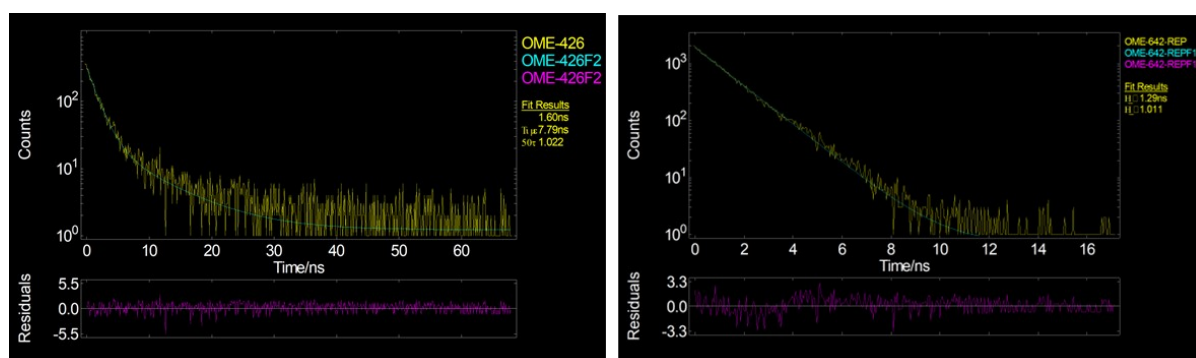

**Figure S25.** Lifetime plot of compound **3** (298 K) in CH<sub>3</sub>CN ( $c = 10^{-5}$  M).

## 7. Quantum yield Measurements:

The quantum yields were determined relative to the reference compounds Rhodamine B and 9,10-diphenyl anthracene. Based on the following equation, the quantum yields were calculated, where subscripts ST and X denote 'standard' and 'test', respectively,  $\Phi$  denotes the fluorescence quantum yield, Grad denotes the gradient derived from the plot of integrated fluorescence intensity versus absorbance, and  $\eta$  denotes the refractive index of the solvents. 1.361 and 1.344 were used as the refractive indices of ethanol and acetonitrile.

$$\Phi_X = \Phi_{ST} \times \left[ \frac{\text{Grad}_X}{\text{Grad}_{ST}} \right] \times \left[ \frac{\eta^2_X}{\eta^2_{ST}} \right]$$

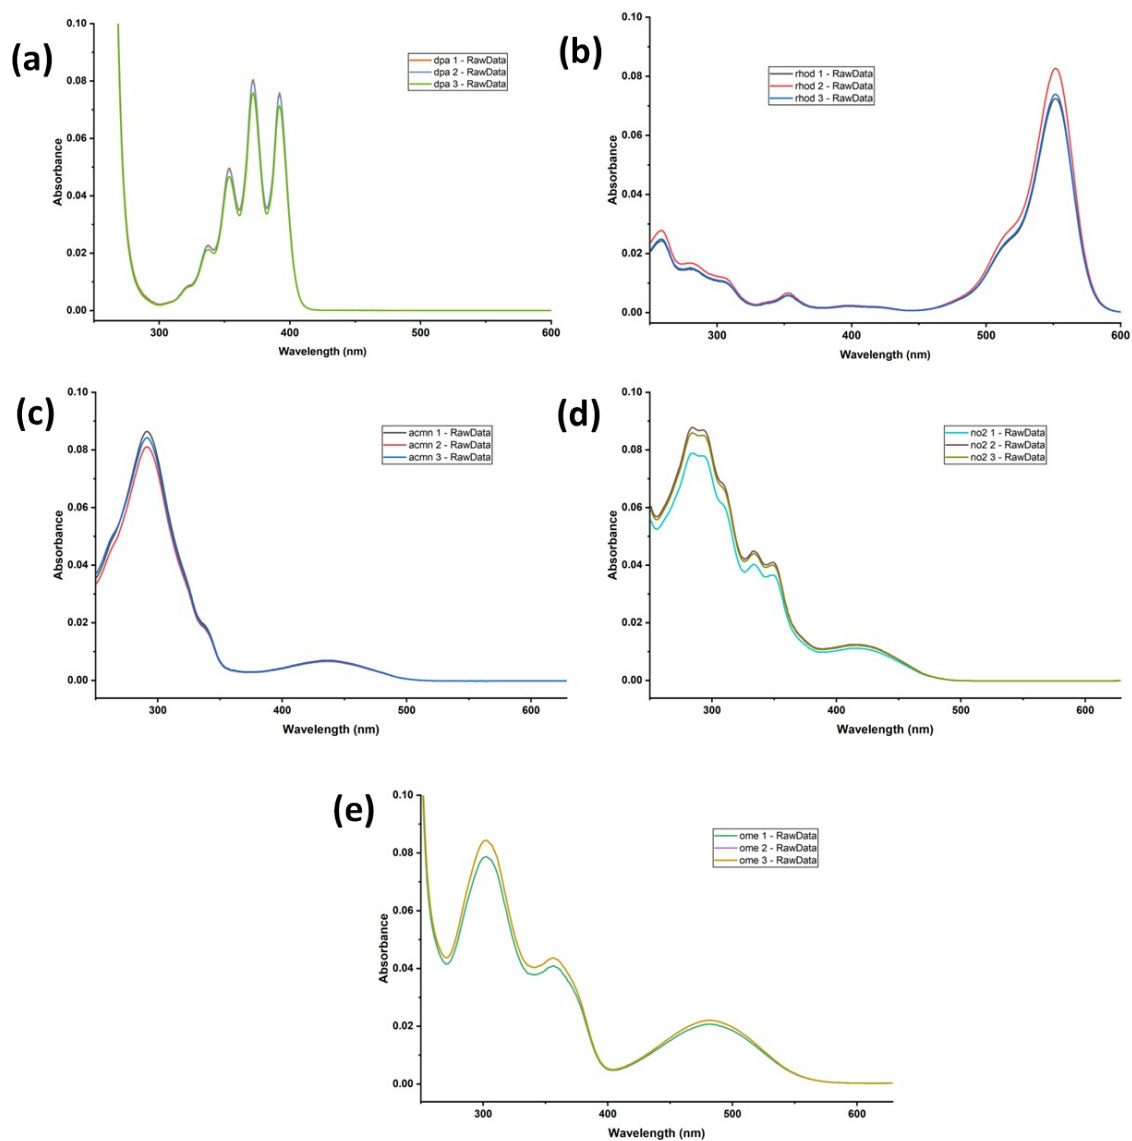

**Figure S26.** UV-Vis spectra of (a) DPA in ethanol; (b) Rhodamine-B in ethanol; (c) compound 1 in CH<sub>3</sub>CN; (d) compound 2 in CH<sub>3</sub>CN and (e) compound 3 in CH<sub>3</sub>CN.

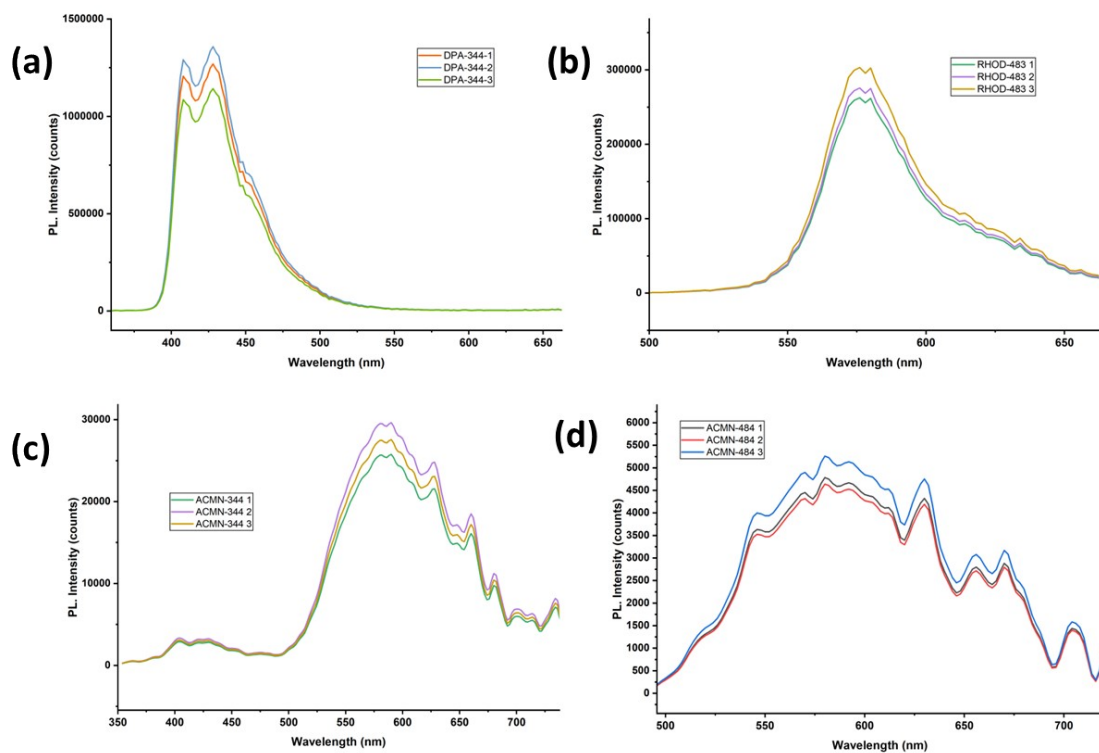

**Figure S27.** PL spectra of (a) DPA excitation at 344 nm in ethanol; (b) Rhodamine-B excitation at 483 nm in ethanol; (c) compound **1** excitation at 344 nm in CH<sub>3</sub>CN; (d) compound **1** excitation at 484 nm in CH<sub>3</sub>CN.

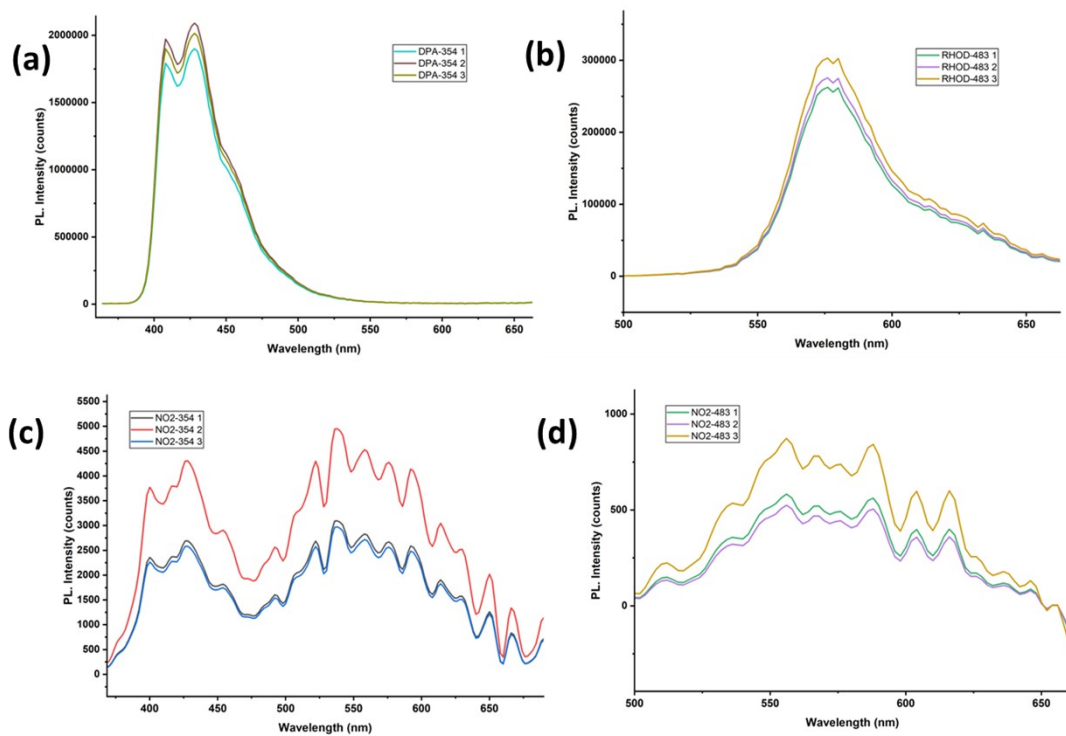

**Figure S28.** PL spectra of (a) DPA excitation at 354 nm in Ethanol; (b) Rhodamine-B excitation at 483 nm in Ethanol; (c) compound **2** excitation at 354 nm in CH<sub>3</sub>CN; (d) compound **5** excitation at 483 nm in CH<sub>3</sub>CN.

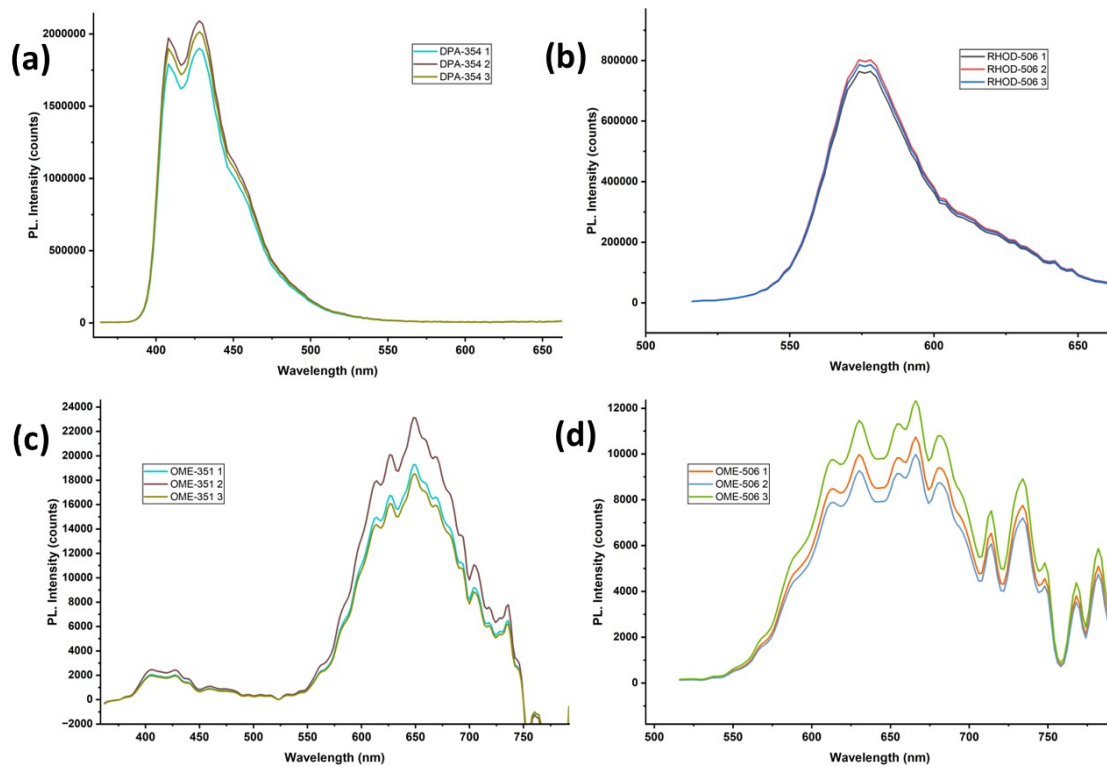

**Figure S29.** PL spectra of (a) DPA excitation at 354 nm in Ethanol; (b) Rhodamine-B excitation at 506 nm in Ethanol; (c) compound **3** excitation at 351 nm in CH<sub>3</sub>CN; (d) compound **3** excitation at 506 nm in CH<sub>3</sub>CN.

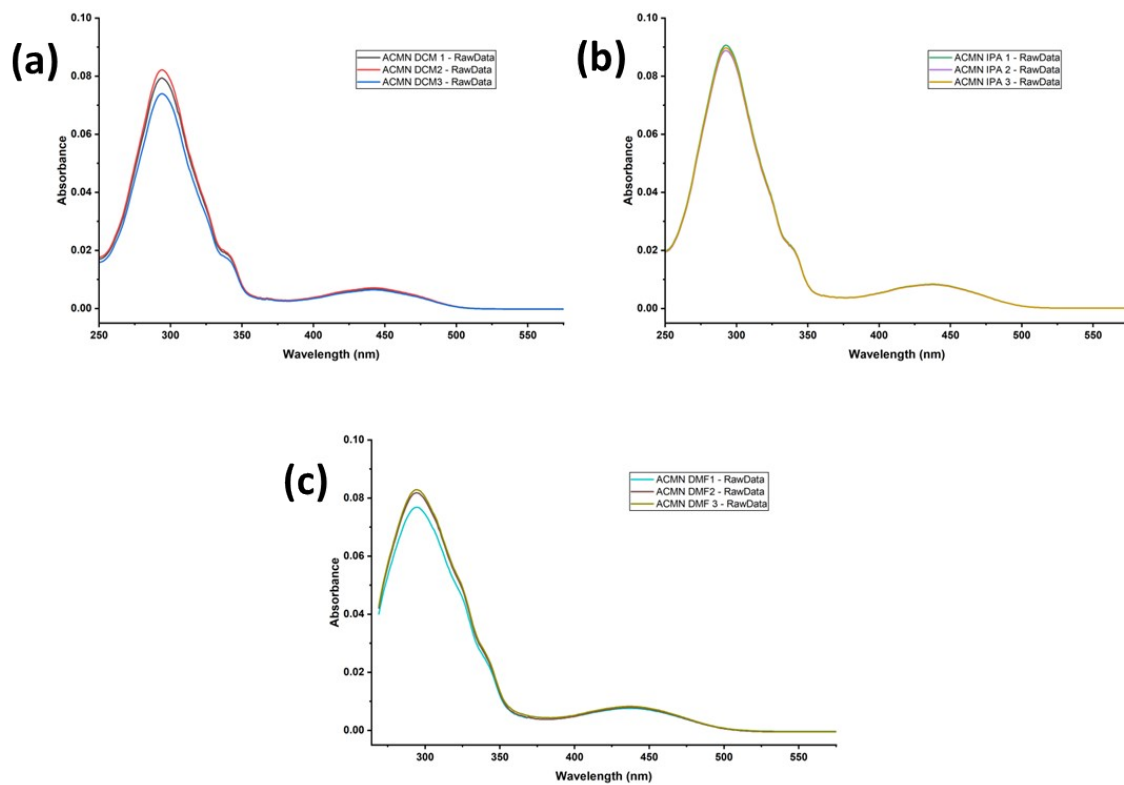

Figure S30. UV-Vis spectra of (a) compound 1 in DCM; (b) IPA and (c) DMF

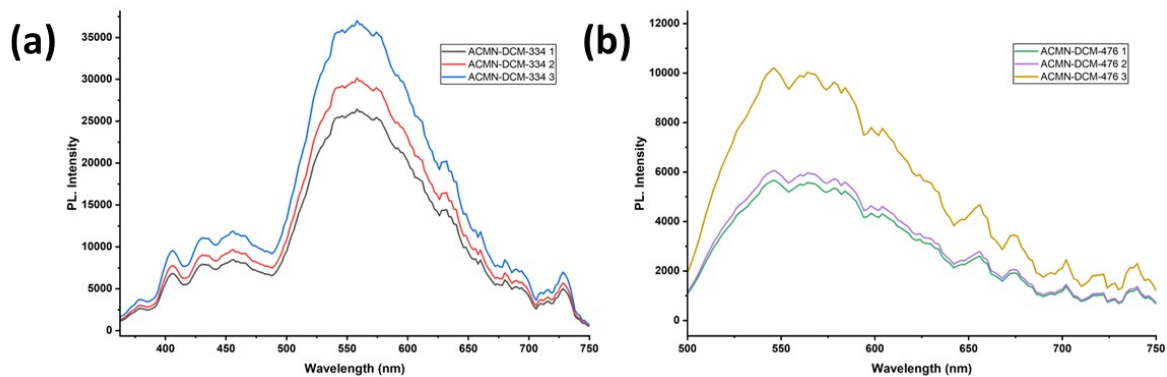

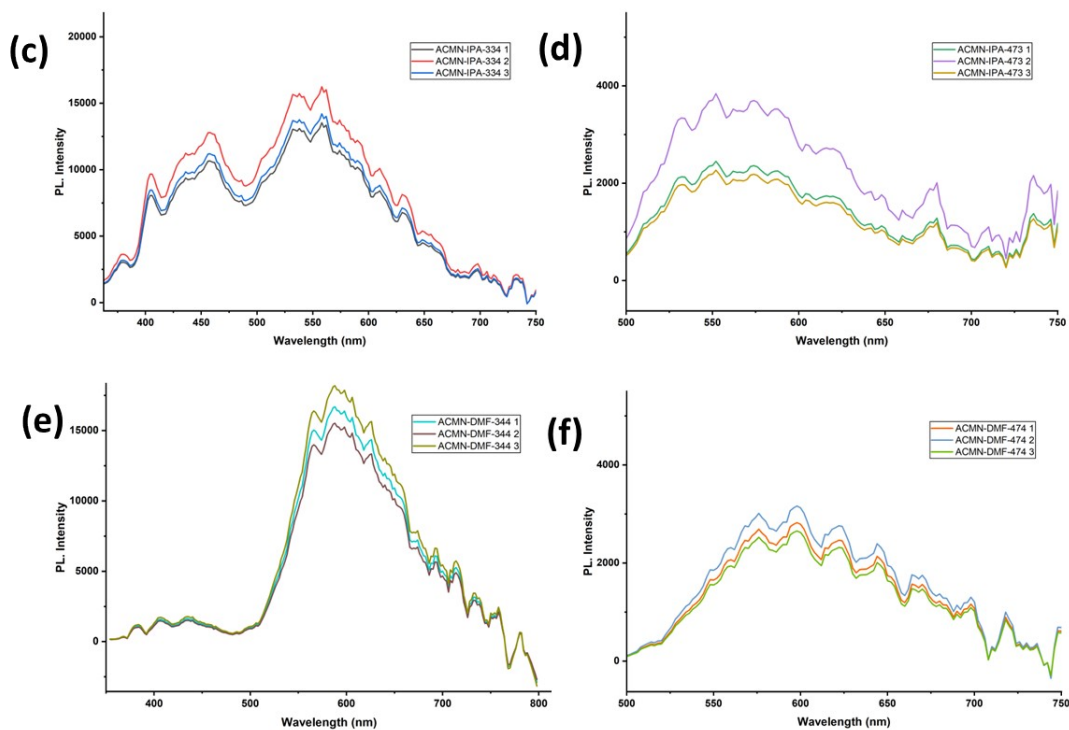

**Figure S31.** PL spectra of compound **1** (a) excitation at 334 nm in DCM; (b) excitation at 476 nm in DCM; (c) excitation at 334 nm in IPA; (d) excitation at 473 nm in IPA; (e) excitation at 344 nm in DMF; (f) excitation at 474 nm in DMF.

**Table S3.** Summary of Quantum yield of compound **1**.

| Quantum yield of compound <b>1</b> |                                |
|------------------------------------|--------------------------------|
| ACN                                | $7.45 \pm 0.21, 5.56 \pm 0.31$ |
| DCM                                | $4.27 \pm 0.11, 2.35 \pm 0.17$ |
| IPA                                | $3.63 \pm 0.25, 0.90 \pm 0.07$ |
| DMF                                | $3.57 \pm 0.31, 1.84 \pm 0.22$ |

**Table S4.** Summary of photophysical studies of precursors and compounds **1-3** in CH<sub>3</sub>CN.

| <b>Compounds</b>           | <b>Solution</b>             |                            |                             |                             | <b>Solid</b>               |
|----------------------------|-----------------------------|----------------------------|-----------------------------|-----------------------------|----------------------------|
|                            | $\lambda_{\text{abs}}$ (nm) | $\lambda_{\text{em}}$ (nm) | $\tau_{\text{FL}}$ (ns)     | $\Phi_{\text{FL}}$          | $\lambda_{\text{em}}$ (nm) |
| <b>ACDI</b>                | 301                         | 436,538                    | -                           | -                           | -                          |
| <b>ACDI-NO<sub>2</sub></b> | 317                         | 426,544                    | -                           | -                           | -                          |
| <b>ACDI-OMe</b>            | 263, 327                    | 443,585                    | -                           | -                           | -                          |
| <b>1</b>                   | 290, 410, 435               | 425,587                    | 1.61 ± 0.01,<br>5.37 ± 0.10 | 7.45 ± 0.21,<br>5.56 ± 0.31 | 595                        |
| <b>2</b>                   | 290, 336, 414               | 425,567                    | 1.27 ± 0.23,<br>1.67 ± 0.04 | 2.64 ± 0.39,<br>1.14 ± 0.29 | 535                        |
| <b>3</b>                   | 303, 455, 482               | 426,642                    | 1.57 ± 0.03,<br>1.41 ± 0.12 | 5.15 ± 0.19,<br>2.84 ± 0.30 | 673                        |

## 8. Crystallographic Information

Single crystals suitable for diffraction were obtained by the slow evaporation of acetonitrile from their solutions. Data were collected on a Bruker D8 Quest diffractometer with Mo K $\alpha$  ( $\lambda = 0.71073$ ) radiation. Data reduction was performed using the Bruker AXS SAINT and SADABS programs. The structures were solved by direct methods using SHELXT 2018. Mercury software was utilized for molecular representations in the diagrams. The CIF file is submitted to CCDC and can be obtained through <https://summary.ccdc.cam.ac.uk/structure-summary-form>.

**Table S5.** Single crystal data of compound **1**.

|                                        |                                                               |
|----------------------------------------|---------------------------------------------------------------|
| Identification code                    | <b>1</b>                                                      |
| Molecular formula                      | C <sub>15</sub> H <sub>6</sub> N <sub>2</sub> O               |
| Formula weight                         | 230.05 g/mol                                                  |
| Temperature/K                          | 273K                                                          |
| Crystal system                         | triclinic                                                     |
| Space group                            | P -1                                                          |
| <i>a</i> /Å                            | 10.1201 (5)                                                   |
| <i>b</i> /Å                            | 16.0962 (7)                                                   |
| <i>c</i> /Å                            | 20.8415 (10)                                                  |
| <i>α</i> /°                            | 89.550 (2)                                                    |
| <i>β</i> /°                            | 82.058 (2)                                                    |
| <i>γ</i> /°                            | 79.000 (1)                                                    |
| Volume/Å <sup>3</sup>                  | 3300.0 (3)                                                    |
| <i>Z</i>                               | 2                                                             |
| $\rho_{\text{calc}}$ g/cm <sup>3</sup> | 1.394                                                         |
| $\mu$ /mm <sup>-1</sup>                | 0.091                                                         |
| <i>F</i> (000)                         | 1420.0                                                        |
| Crystal size/mm <sup>3</sup>           | 0.22 × 0.18 × 0.13                                            |
| Radiation                              | Mo K $\alpha$ ( $\lambda$ = 0.71073)                          |
| 2 $\Theta$ range for data collection/° | 3.948 to 54.308                                               |
| Index ranges                           | -12 ≤ <i>h</i> ≤ 12, -20 ≤ <i>k</i> ≤ 20, -26 ≤ <i>l</i> ≤ 26 |

|                                                |                                                                   |
|------------------------------------------------|-------------------------------------------------------------------|
| Reflections collected                          | 98561                                                             |
| Independent reflections                        | 14582 [ $R_{\text{int}} = 0.0524$ , $R_{\text{sigma}} = 0.0350$ ] |
| Data/restraints/parameters                     | 14582/0/973                                                       |
| Goodness-of-fit on $F^2$                       | 1.368                                                             |
| Final $R$ indexes [ $I \geq 2\sigma(I)$ ]      | $R_1 = 0.0681$ , $wR_2 = 0.1961$                                  |
| Final $R$ indexes [all data]                   | $R_1 = 0.0962$ , $wR_2 = 0.2067$                                  |
| Largest diff. peak/hole / $e \text{ \AA}^{-3}$ | 0.33/-0.47                                                        |

**Table S6.** Single crystal data of compound **3**.

|                     |                                               |
|---------------------|-----------------------------------------------|
| Identification code | <b>3</b>                                      |
| Molecular formula   | $\text{C}_{16}\text{H}_8\text{N}_2\text{O}_2$ |
| Formula weight      | 260.24 g/mol                                  |
| Temperature/K       | 303K                                          |
| Crystal system      | monoclinic                                    |
| Space group         | $P2_1/c$                                      |
| $a/\text{\AA}$      | 6.994 (3)                                     |
| $b/\text{\AA}$      | 16.658 (6)                                    |
| $c/\text{\AA}$      | 20.028 (8)                                    |
| $\alpha/^\circ$     | 90                                            |
| $\beta/^\circ$      | 95.265 (15)                                   |
| $\gamma/^\circ$     | 90                                            |

|                                                |                                                                |
|------------------------------------------------|----------------------------------------------------------------|
| Volume/Å <sup>3</sup>                          | 2323.5                                                         |
| Z                                              | 4                                                              |
| $\rho_{\text{calc}}$ g/cm <sup>3</sup>         | 1.488                                                          |
| $\mu$ /mm <sup>-1</sup>                        | 0.101                                                          |
| <i>F</i> (000)                                 | 1072                                                           |
| Crystal size/mm <sup>3</sup>                   | 0.195 × 0.158 × 0.015                                          |
| Radiation                                      | Mo K $\alpha$ ( $\lambda$ = 0.71073)                           |
| 2 $\Theta$ range for data collection/°         | 4.048 to 54.204                                                |
| Index ranges                                   | -8 ≤ <i>h</i> ≤ 8, -20 ≤ <i>k</i> ≤ 21, -25 ≤ <i>l</i> ≤ 25    |
| Reflections collected                          | 45810                                                          |
| Independent reflections                        | 5099 [ $R_{\text{int}}$ = 0.0923, $R_{\text{sigma}}$ = 0.0580] |
| Data/restraints/parameters                     | 5099/0/363                                                     |
| Goodness-of-fit on $F^2$                       | 1.057                                                          |
| Final <i>R</i> indexes [ $I \geq 2\sigma(I)$ ] | $R_1$ = 0.0810, $wR_2$ = 0.2206                                |
| Final <i>R</i> indexes [all data]              | $R_1$ = 0.1049, $wR_2$ = 0.2470                                |
| Largest diff. peak/hole / e Å <sup>-3</sup>    | 0.65/-0.37                                                     |

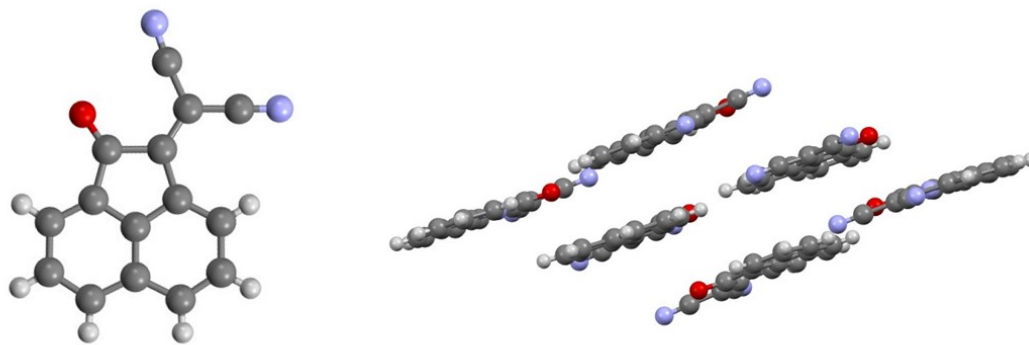

**Figure S32.** Single crystal structure and packing of compound **1**.

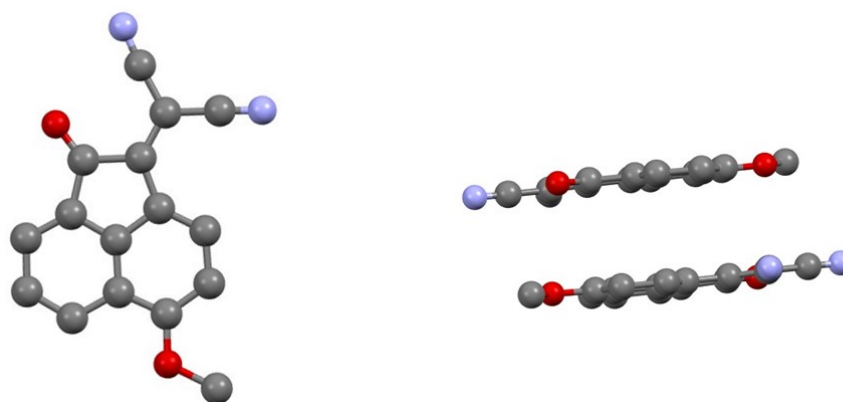

**Figure S33.** Single crystal structure and packing of compound **3**.

## 9. DFT Calculation

All theoretical calculations were performed using the Gaussian 16, Revision A.03. Geometries were optimized in acetonitrile with the PCM solvation model by PBE1PBE 6-311+g(d,p). Vibrational frequencies were calculated at the same level as the optimized structure. Density functional theory (DFT) and time-dependent DFT (TDDFT) calculations were performed using the PBE functional and 6-311+g(d,p) basis set. The comparison table of experimental and calculated data, ground and excited states optimized structures are given below.

**Table S7.** Comparison of photophysical properties between experimental and calculated data.

| Compounds | Absorbance                                  |                                            | Emission                                    |                                            |
|-----------|---------------------------------------------|--------------------------------------------|---------------------------------------------|--------------------------------------------|
|           | $\lambda_{\max}(\text{nm})$<br>Experimental | $\lambda_{\max}(\text{nm})$<br>Theoretical | $\lambda_{\max}(\text{nm})$<br>experimental | $\lambda_{\max}(\text{nm})$<br>Theoretical |
| <b>1</b>  | 290, 337, 435                               | 314, 333, 486                              | 425, 587                                    | 468, 610                                   |
| <b>2</b>  | 290, 336, 414                               | 323, 358, 470                              | 425, 567                                    | 444, 578                                   |
| <b>3</b>  | 303, 355, 482                               | 321, 366, 531                              | 426, 642                                    | 445, 665                                   |

### 9.1 Compound 1 Gaussian optimization

Ground state optimization

opt freq=noraman PBE1PBE/6-311+g(d,p) scrf=(solvent=acetonitrile,pcm) geom=connectivity  
scf=(tight,maxcycle=1000)

#### Cartesian coordinates of the structures

```
C      -1.05495300  -0.11505300  -0.00004600
C      -0.45107100  -1.52543300  -0.00006000
O      -1.09039300  -2.54893200  -0.00011700
C      1.23998400   0.05225100   0.00006600
C      2.52550300   0.61011200   0.00013500
C      0.04753700   0.82368400   0.00003800
C      0.15284200   2.20068300   0.00008200
H      -0.71872500   2.84357100   0.00006500
C      2.59594600   2.02487400   0.00017900
C      1.44001000   2.78069400   0.00015300
```

|   |             |             |             |
|---|-------------|-------------|-------------|
| H | 1.51769100  | 3.86222700  | 0.00018700  |
| H | 3.56382000  | 2.51580600  | 0.00023200  |
| C | 1.00833900  | -1.33299100 | 0.00001200  |
| C | 3.60499400  | -0.30776300 | 0.00015000  |
| C | 2.06788500  | -2.20901000 | 0.00002700  |
| H | 1.91486700  | -3.28268400 | -0.00001400 |
| C | 3.37345500  | -1.67016800 | 0.00009800  |
| H | 4.21942000  | -2.34854300 | 0.00011100  |
| H | 4.62384900  | 0.06632400  | 0.00020300  |
| C | -2.39651500 | 0.09929200  | -0.00010800 |
| C | -2.94674800 | 1.41257400  | -0.00008500 |
| C | -3.36673700 | -0.94721800 | -0.00020500 |
| N | -4.23406500 | -1.70938700 | -0.00028800 |
| N | -3.40030800 | 2.47447100  | -0.00006400 |

### **S<sub>1</sub> excited state optimization**

```
# opt=calcfc freq=noraman td=(nstates=10,root=1,read) PBE1PBE /6-311+g(d,p)
scrf=(solvent=acetonitrile,pcm) pbe1pbe scf=(tight,maxcycle=1000)
```

### **Cartesian coordinates of the structures**

|   |             |             |             |
|---|-------------|-------------|-------------|
| C | -1.05215900 | -0.18672100 | -0.00005900 |
| C | -0.47068800 | -1.51671500 | -0.00007800 |
| O | -1.03760500 | -2.60597100 | -0.00013800 |
| C | 1.25805900  | 0.05957100  | 0.00006000  |
| C | 2.53364700  | 0.63073500  | 0.00013700  |
| C | 0.04558500  | 0.78459500  | 0.00002000  |

|   |             |             |             |
|---|-------------|-------------|-------------|
| C | 0.13924600  | 2.18370900  | 0.00005900  |
| H | -0.74114100 | 2.81361400  | 0.00003000  |
| C | 2.59815000  | 2.03655400  | 0.00017900  |
| C | 1.40527200  | 2.77582900  | 0.00013900  |
| H | 1.46852300  | 3.85819300  | 0.00017200  |
| H | 3.55454300  | 2.54775700  | 0.00023800  |
| C | 1.02070400  | -1.31203500 | 0.00000200  |
| C | 3.61898600  | -0.27429600 | 0.00016300  |
| C | 2.10448000  | -2.19776600 | 0.00003000  |
| H | 1.95123400  | -3.27101400 | -0.00001000 |
| C | 3.39007000  | -1.66071700 | 0.00010900  |
| H | 4.24436200  | -2.32741100 | 0.00012900  |
| H | 4.63719300  | 0.10003000  | 0.00022500  |
| C | -2.42643300 | 0.09231900  | -0.00010300 |
| C | -2.93558800 | 1.40620800  | -0.00004900 |
| C | -3.41895600 | -0.91460200 | -0.00020700 |
| N | -4.29863100 | -1.67103500 | -0.00029400 |
| N | -3.36938900 | 2.48340500  | -0.00000500 |

### **S<sub>3</sub> excited state optimization**

```
# opt=calcfreq=noraman td=(nstates=20,root=3,read) PBE1PBE /6-311+g(d,p)
scrf=(solvent=acetonitrile,pcm) scf=(tight,maxcycle=1000)
```

### **Cartesian coordinates of the structures**

|   |             |             |             |
|---|-------------|-------------|-------------|
| C | -1.05215900 | -0.18672100 | -0.00005900 |
| C | -0.47068800 | -1.51671500 | -0.00007800 |

|   |             |             |             |
|---|-------------|-------------|-------------|
| O | -1.03760500 | -2.60597100 | -0.00013800 |
| C | 1.25805900  | 0.05957100  | 0.00006000  |
| C | 2.53364700  | 0.63073500  | 0.00013700  |
| C | 0.04558500  | 0.78459500  | 0.00002000  |
| C | 0.13924600  | 2.18370900  | 0.00005900  |
| H | -0.74114100 | 2.81361400  | 0.00003000  |
| C | 2.59815000  | 2.03655400  | 0.00017900  |
| C | 1.40527200  | 2.77582900  | 0.00013900  |
| H | 1.46852300  | 3.85819300  | 0.00017200  |
| H | 3.55454300  | 2.54775700  | 0.00023800  |
| C | 1.02070400  | -1.31203500 | 0.00000200  |
| C | 3.61898600  | -0.27429600 | 0.00016300  |
| C | 2.10448000  | -2.19776600 | 0.00003000  |
| H | 1.95123400  | -3.27101400 | -0.00001000 |
| C | 3.39007000  | -1.66071700 | 0.00010900  |
| H | 4.24436200  | -2.32741100 | 0.00012900  |
| H | 4.63719300  | 0.10003000  | 0.00022500  |
| C | -2.42643300 | 0.09231900  | -0.00010300 |
| C | -2.93558800 | 1.40620800  | -0.00004900 |
| C | -3.41895600 | -0.91460200 | -0.00020700 |
| N | -4.29863100 | -1.67103500 | -0.00029400 |
| N | -3.36938900 | 2.48340500  | -0.00000500 |

**Table S8.** Calculated absorption represented as  $\Delta E$  in eV, oscillation strengths ( $f$ ), orbital composition and transition dipole moments ( $\mu$ ) and dipole square ( $\mu^2$ ) of low-lying states of compound **1** ( $H_0, H_1, H_2, H_3, H_4$  represent HOMO, HOMO-1 HOMO-2, HOMO-3 and HOMO-4 orbitals, respectively.  $L_0$ , and  $L_1$  correspond to LUMO, and LUMO-1 respectively. Calculations were performed in acetonitrile using PBE functional and 6-311+g(d,p) basis set.

| Excited state  | $\Delta E$ (eV) | $f$    | composition                                                      | $\mu$ (X, Y, Z)             | $\mu^2$ |
|----------------|-----------------|--------|------------------------------------------------------------------|-----------------------------|---------|
| S <sub>1</sub> | 2.5463          | 0.0982 | H <sub>0</sub> -L <sub>0</sub>                                   | (1.2384, 0.2002, 0.0001)    | 1.5737  |
| S <sub>2</sub> | 3.0244          | 0.0000 | H <sub>3</sub> -L <sub>0</sub><br>H <sub>3</sub> -L <sub>1</sub> | (0.0000, 0.0000, -0.0082)   | 0.0001  |
| S <sub>3</sub> | 3.3550          | 0.0281 | H <sub>1</sub> -L <sub>0</sub>                                   | (0.5723, -0.1191, 0.0000)   | 0.3418  |
| S <sub>4</sub> | 3.7141          | 0.2996 | H <sub>2</sub> -L <sub>1</sub>                                   | (-1.7424, -0.5064, -0.0001) | 3.2924  |
| S <sub>5</sub> | 3.9364          | 0.8661 | H <sub>4</sub> -L <sub>0</sub>                                   | (-2.9929, -0.1527, -0.0001) | 8.9805  |
| S <sub>6</sub> | 4.2517          | 0.1278 | H <sub>2</sub> -L <sub>1</sub>                                   | (-0.2664, 1.0750, 0.0000)   | 1.2267  |

**Table S9.** Calculated fluorescence represented as  $\Delta E$  in eV, oscillation strengths ( $f$ ), orbital composition and transition dipole moments ( $\mu$ ) and dipole square ( $\mu^2$ ) of low-lying states of **compound 1** ( $H_0$ , and  $H_1$  represent HOMO, and HOMO-1 orbitals, respectively.  $L_0$  corresponds to LUMO. Calculations were performed in acetonitrile using PBE functional and 6-311+g(d,p) basis set.

| Excited state  | $\Delta E$ (eV) | $f$    | composition                          | $\mu$ (X, Y, Z)           | $\mu^2$ |
|----------------|-----------------|--------|--------------------------------------|---------------------------|---------|
| S <sub>1</sub> | 2.0324          | 0.0681 | H <sub>0</sub> -L <sub>0</sub> (99%) | (1.1550, 0.1837, 0.0001)  | 1.3678  |
| S <sub>3</sub> | 3.0170          | 0.0239 | H <sub>1</sub> -L <sub>0</sub> (99%) | (0.5543, -0.1243, 0.0000) | 0.3227  |

## 9.2 Compound 2 Gaussian optimization

### Ground state optimization

# opt freq=noraman PBE1PBE/6-311+g(d,p) geom=connectivity scrf=(pcm,solvent=acetonitrile)  
scf=(tight,maxcycle=1000)

**Cartesian coordinates of the structures**

|   |             |             |             |
|---|-------------|-------------|-------------|
| C | -2.97811100 | -0.74174100 | -0.00000700 |
| C | 0.12560700  | -1.79508600 | -0.00003700 |
| C | -0.43891900 | -0.53951900 | -0.00003600 |
| C | 0.40917800  | 0.59986500  | -0.00001600 |
| C | 1.81676200  | 0.55091200  | 0.00001200  |
| C | 2.34277100  | -0.77664500 | 0.00000900  |
| C | 1.52669100  | -1.88906600 | -0.00001700 |
| H | -0.46356800 | -2.70249800 | -0.00005000 |
| C | -0.31494500 | 1.80636000  | -0.00002500 |
| H | 1.99440500  | -2.86487200 | -0.00001800 |
| C | 1.74531200  | 2.98769000  | 0.00004300  |
| C | 0.33774600  | 3.01305700  | 0.00000700  |
| H | 2.28737400  | 3.92676200  | 0.00006700  |
| H | -0.20380400 | 3.95226000  | -0.00000100 |
| C | -1.80975800 | -0.05565500 | -0.00003900 |
| C | -1.74750000 | 1.46896300  | -0.00008400 |
| O | -2.70422600 | 2.20270800  | 0.00005800  |
| C | -4.26040200 | -0.11243000 | -0.00001600 |
| N | -5.34191000 | 0.29004000  | -0.00002400 |
| C | -3.02195300 | -2.16597200 | 0.00003800  |
| N | -3.06819700 | -3.31911300 | 0.00007600  |

|   |            |             |             |
|---|------------|-------------|-------------|
| N | 3.78640800 | -1.03991900 | 0.00003000  |
| O | 4.15911200 | -2.19757000 | 0.00001000  |
| O | 4.54310400 | -0.08689400 | -0.00005400 |
| C | 2.47067600 | 1.81071600  | 0.00004400  |
| H | 3.54864600 | 1.85665100  | 0.00007100  |

### **S<sub>1</sub> excited state optimization**

# opt=calcfc freq=noraman td=(nstates=10,root=1,read) PBE1PBE /6-311+g(d,p)scrf=(solvent=acetonitrile,pcm) scf=(tight,maxcycle=1000)

### **Cartesian coordinates of the structures**

|   |             |             |             |
|---|-------------|-------------|-------------|
| C | -3.01834200 | -0.73492900 | -0.01503100 |
| C | 0.10470700  | -1.79334700 | -0.00933800 |
| C | -0.46967000 | -0.51086100 | -0.00601300 |
| C | 0.42977300  | 0.59615100  | 0.00509900  |
| C | 1.82600700  | 0.52308800  | 0.00135900  |
| C | 2.34430500  | -0.78930200 | -0.00914100 |
| C | 1.48621600  | -1.90379100 | -0.00154800 |
| H | -0.49742900 | -2.69222900 | -0.01960100 |
| C | -0.27272300 | 1.79327200  | 0.02376200  |
| H | 1.94313900  | -2.88563400 | -0.00135400 |
| C | 1.79429700  | 2.98335700  | 0.06607200  |
| C | 0.40562800  | 3.01918000  | 0.05317500  |
| H | 2.35492500  | 3.90976100  | 0.09667100  |
| H | -0.13466500 | 3.95861800  | 0.07021100  |
| C | -1.81802300 | -0.00743400 | -0.00494600 |

|   |             |             |             |
|---|-------------|-------------|-------------|
| C | -1.74240000 | 1.45630000  | 0.01100500  |
| O | -2.64725400 | 2.26833900  | 0.01718200  |
| C | -4.29057200 | -0.12068200 | -0.01970400 |
| N | -5.36985700 | 0.30390400  | -0.02432500 |
| C | -3.04771300 | -2.14350800 | -0.02180900 |
| N | -3.08049500 | -3.30360400 | -0.02766600 |
| N | 3.76964200  | -1.05862300 | -0.02471100 |
| O | 4.13988300  | -2.15749500 | 0.35290000  |
| O | 4.51776100  | -0.17896000 | -0.42029500 |
| C | 2.50663800  | 1.77623500  | 0.04736000  |
| H | 3.58711400  | 1.80029300  | 0.07088400  |

### **S<sub>3</sub> excited state optimization**

# opt=calcfc freq=noraman td=(nstates=10,root=3,read) PBE1PBE /6-311+g(d,p)scrf=(solvent=acetonitrile,pcm) scf=(tight,maxcycle=1000)

### **Cartesian coordinates of the structures**

|   |             |             |             |
|---|-------------|-------------|-------------|
| C | -3.02772200 | -0.75383900 | -0.00001500 |
| C | 0.10174700  | -1.74602200 | 0.00002100  |
| C | -0.47905500 | -0.49749400 | 0.00000200  |
| C | 0.40873500  | 0.61565300  | 0.00000300  |
| C | 1.84643600  | 0.55397000  | 0.00000200  |
| C | 2.38188100  | -0.77789500 | 0.00000300  |
| C | 1.53391200  | -1.85699200 | 0.00003100  |
| H | -0.47678200 | -2.66092300 | 0.00002600  |
| C | -0.31991400 | 1.80749700  | 0.00001600  |

|   |             |             |             |
|---|-------------|-------------|-------------|
| H | 1.97246300  | -2.84739300 | 0.00005500  |
| C | 1.78986300  | 2.96769500  | 0.00007400  |
| C | 0.33932800  | 2.99958300  | 0.00004900  |
| H | 2.32061300  | 3.91274800  | 0.00011400  |
| H | -0.17960600 | 3.95141100  | 0.00006400  |
| C | -1.83989800 | -0.00447900 | -0.00000300 |
| C | -1.78166800 | 1.45429800  | 0.00000500  |
| O | -2.70258200 | 2.25558900  | 0.00000500  |
| C | -4.31123900 | -0.16418100 | -0.00001400 |
| N | -5.39839500 | 0.23969100  | -0.00001400 |
| C | -3.02542400 | -2.16152800 | -0.00003100 |
| N | -3.01820000 | -3.32251000 | -0.00004400 |
| N | 3.80379400  | -1.05586200 | -0.00003200 |
| O | 4.15962800  | -2.22222500 | 0.00035600  |
| O | 4.57578800  | -0.10987900 | -0.00047100 |
| C | 2.51581200  | 1.79603600  | 0.00005200  |
| H | 3.59347300  | 1.83321600  | 0.00006700  |

**Table S10.** Calculated absorption represented as  $\Delta E$  in eV, oscillation strengths ( $f$ ), orbital composition and transition dipole moments ( $\mu$ ) and dipole square ( $\mu^2$ ) of low-lying states of compound **2** ( $H_0$ ,  $H_2$ ,  $H_4$ ,  $H_5$  represent HOMO, HOMO-2, HOMO-4 and HOMO-5 orbitals, respectively.  $L_0$ , and  $L_1$  correspond to LUMO, and LUMO-1, respectively. Calculations were performed in acetonitrile using PBE functional and 6-311+g(d,p) basis set.

| Excited state  | $E$ (eV) | $f$    | composition                                                      | $\mu$ (X, Y, Z)             | $\mu^2$ |
|----------------|----------|--------|------------------------------------------------------------------|-----------------------------|---------|
| S <sub>1</sub> | 2.6329   | 0.1638 | H <sub>0</sub> -L <sub>0</sub>                                   | (1.5937, 0.0075, -0.0000)   | 2.5400  |
| S <sub>2</sub> | 2.9683   | 0.0000 | H <sub>2</sub> -L <sub>0</sub>                                   | (0.0004, 0.0001, 0.0155)    | 0.0002  |
| S <sub>3</sub> | 3.3409   | 0.0743 | H <sub>2</sub> -L <sub>0</sub><br>H <sub>0</sub> -L <sub>1</sub> | (-0.0556, -0.9510, -0.0000) | 0.9075  |
| S <sub>4</sub> | 3.4619   | 0.4027 | H <sub>0</sub> -L <sub>1</sub>                                   | (2.1751, -0.1291, 0.0000)   | 4.7476  |
| S <sub>5</sub> | 3.6553   | 0.0000 | H <sub>5</sub> -L <sub>0</sub><br>H <sub>5</sub> -L <sub>1</sub> | (-0.0002, -0.0001, -0.0100) | 0.0001  |
| S <sub>6</sub> | 3.8335   | 0.7906 | H <sub>4</sub> -L <sub>0</sub>                                   | (2.7582, 0.9002, -0.0000)   | 8.4180  |

**Table S11.** Calculated fluorescence represented as  $\Delta E$  in eV, oscillation strengths ( $f$ ), orbital composition and transition dipole moments ( $\mu$ ) and dipole square ( $\mu^2$ ) of low-lying states of compound **2** ( $H_0$  and  $H_1$  represent HOMO and HOMO-1 orbitals, respectively.  $L_0$  corresponds to LUMO. Calculations were performed in acetonitrile using PBE functional and 6-311+g(d,p) basis set.

| Excited state  | $E$ (eV) | $f$    | composition                          | $\mu$ (X, Y, Z)             | $\mu^2$ |
|----------------|----------|--------|--------------------------------------|-----------------------------|---------|
| S <sub>1</sub> | 2.1447   | 0.1359 | H <sub>0</sub> -L <sub>0</sub> (98%) | (1.6041, 0.1138, -0.0020)   | 2.5860  |
| S <sub>3</sub> | 2.7919   | 0.0554 | H <sub>1</sub> -L <sub>0</sub> (98%) | (-0.4983, -0.7496, -0.0000) | 0.8101  |

### 9.3 Compound **3** Gaussian optimization

Ground state optimization

opt freq=noraman PBE1PBE/6-311+g(d,p) scf=(solvent=acetonitrile,pcm) geom=connectivity  
scf=(tight,maxcycle=1000)

**Cartesian coordinates of the structures**

|   |             |             |             |
|---|-------------|-------------|-------------|
| C | 0.53335400  | 3.01769700  | 0.00005500  |
| C | -0.13138600 | 1.81358400  | 0.00002700  |
| C | 0.58652300  | 0.60844300  | 0.00000900  |
| C | 1.98092400  | 0.56854700  | 0.00001800  |
| C | 2.65647600  | 1.81023300  | 0.00004700  |
| C | 1.94382400  | 2.99560000  | 0.00006500  |
| H | -0.00352700 | 3.96014200  | 0.00006900  |
| C | -0.25182400 | -0.54304800 | -0.00001900 |
| C | 2.57383200  | -0.73262000 | -0.00000200 |
| H | 2.48427200  | 3.93556600  | 0.00008700  |
| C | 1.76295200  | -1.86599800 | -0.00003600 |
| C | 0.36183200  | -1.78383600 | -0.00004400 |
| H | 2.21662600  | -2.84850300 | -0.00005900 |
| H | -0.20974900 | -2.70415600 | -0.00007000 |
| C | -1.56177600 | 1.45708900  | 0.00001200  |
| C | -1.61015100 | -0.07710500 | -0.00001700 |
| C | -2.78892500 | -0.76471600 | -0.00003100 |
| O | -2.52786700 | 2.17992000  | 0.00001800  |
| C | -2.81861500 | -2.18589600 | -0.00005500 |
| N | -2.84292900 | -3.34122400 | -0.00007500 |
| C | -4.07103800 | -0.14382800 | -0.00002500 |
| N | -5.15519300 | 0.25580600  | -0.00002200 |
| H | 3.74027900  | 1.82895300  | 0.00005500  |

|   |            |             |             |
|---|------------|-------------|-------------|
| O | 3.90392900 | -0.75564900 | 0.00000800  |
| C | 4.57714500 | -2.01152300 | 0.00003800  |
| H | 4.32648700 | -2.58460700 | -0.89641400 |
| H | 5.63871500 | -1.77475500 | 0.00009900  |
| H | 4.32638700 | -2.58461700 | 0.89645700  |

### **S<sub>1</sub> excited state optimization**

opt=calcfc freq=noraman td=(nstates=10,root=1,read) PBE1PBE/6-311+g(d,p)  
scf=(solvent=acetonitrile,pcm) scf=(tight,maxcycle=1000)

### **Cartesian coordinates of the structures**

|   |             |             |             |
|---|-------------|-------------|-------------|
| C | 0.53077200  | 3.02706400  | 0.00005300  |
| C | -0.14371700 | 1.81342900  | 0.00002700  |
| C | 0.60027200  | 0.62269000  | 0.00001500  |
| C | 1.99741100  | 0.58204800  | 0.00002900  |
| C | 2.66552700  | 1.80975200  | 0.00005400  |
| C | 1.92856500  | 3.00502000  | 0.00006600  |
| H | -0.00487100 | 3.96990100  | 0.00006200  |
| C | -0.24297600 | -0.49908600 | -0.00001000 |
| C | 2.58826400  | -0.72657500 | 0.00001400  |
| H | 2.47053300  | 3.94415900  | 0.00008600  |
| C | 1.74932100  | -1.86425000 | -0.00001300 |
| C | 0.36227800  | -1.76485400 | -0.00002500 |
| H | 2.19519400  | -2.85030000 | -0.00002500 |
| H | -0.22330100 | -2.67567000 | -0.00004600 |
| C | -1.58845700 | 1.45082000  | 0.00000700  |
| C | -1.63211700 | -0.00086100 | -0.00001600 |
| C | -2.79212900 | -0.77369100 | -0.00004000 |

|   |             |             |             |
|---|-------------|-------------|-------------|
| O | -2.54203000 | 2.23857300  | 0.00001000  |
| C | -2.77058700 | -2.18500400 | -0.00006100 |
| N | -2.77010000 | -3.34563300 | -0.00007900 |
| C | -4.09379900 | -0.21413500 | -0.00004600 |
| N | -5.19610000 | 0.14524600  | -0.00005300 |
| H | 3.74870100  | 1.84544300  | 0.00006600  |
| O | 3.89882800  | -0.77685700 | 0.00002800  |
| C | 4.57991700  | -2.03710500 | 0.00001700  |
| H | 4.32675800  | -2.60319000 | -0.89846700 |
| H | 5.63799600  | -1.78973000 | 0.00003600  |
| H | 4.32673300  | -2.60321800 | 0.89847600  |

### **S<sub>3</sub> excited state optimization**

# opt=calcfc freq=noraman td=(nstates=10,root=3,read) PBE1PBE/6-311+g(d,p)  
 scrf=(solvent=acetonitrile,pcm) scf=(tight,maxcycle=1000)

### **Cartesian coordinates of the structures**

|   |             |             |            |
|---|-------------|-------------|------------|
| C | 0.53834000  | 2.98680800  | 0.00003400 |
| C | -0.14434800 | 1.79813300  | 0.00000900 |
| C | 0.58034600  | 0.61013500  | 0.00008000 |
| C | 2.01358700  | 0.55935500  | 0.00009100 |
| C | 2.70749200  | 1.79518700  | 0.00010200 |
| C | 1.99353800  | 2.96316800  | 0.00004800 |
| H | 0.02424400  | 3.94191500  | 0.00010000 |
| C | -0.27957600 | -0.51072100 | 0.00004000 |
| C | 2.61052700  | -0.73816800 | 0.00002000 |
| H | 2.51564300  | 3.91265500  | 0.00005900 |

|   |             |             |             |
|---|-------------|-------------|-------------|
| C | 1.77995300  | -1.83619900 | -0.00000700 |
| C | 0.33185600  | -1.73557500 | -0.00002200 |
| H | 2.20075200  | -2.83347300 | -0.00000900 |
| H | -0.22746700 | -2.66346900 | -0.00010200 |
| C | -1.60243800 | 1.44191200  | -0.00002300 |
| C | -1.65590700 | -0.00599600 | -0.00003100 |
| C | -2.83640100 | -0.76791200 | -0.00005400 |
| O | -2.53316400 | 2.25114000  | -0.00002100 |
| C | -2.81263700 | -2.17488000 | 0.00000500  |
| N | -2.78776400 | -3.33658900 | 0.00005200  |
| C | -4.12889200 | -0.19865600 | -0.00011900 |
| N | -5.22422500 | 0.18490300  | -0.00017500 |
| H | 3.78966500  | 1.80476500  | 0.00012000  |
| O | 3.94608100  | -0.75934400 | 0.00001400  |
| C | 4.59598500  | -2.02565000 | -0.00002700 |
| H | 4.33356700  | -2.59494400 | -0.89656000 |
| H | 5.66203000  | -1.81067300 | -0.00003900 |
| H | 4.33359700  | -2.59498800 | 0.89648500  |

**Table S12.** Calculated absorbance represented as  $\Delta E$  in eV, oscillation strengths ( $f$ ), orbital composition and transition dipole moments ( $\mu$ ) and dipole square ( $\mu^2$ ) of low-lying states of compound **3** ( $H_0$ ,  $H_1$ ,  $H_2$ , and  $H_3$  represent HOMO, HOMO-1 and HOMO-2 orbitals, respectively.  $L_0$  and  $L_1$  correspond to LUMO, and LUMO-1, respectively. Calculations were performed in acetonitrile using PBE functional and 6-311+g(d,p) basis set.

| Excited state  | $E$ (eV) | $f$    | composition                                                      | $\mu$ (X, Y, Z)            | $\mu^2$ |
|----------------|----------|--------|------------------------------------------------------------------|----------------------------|---------|
| S <sub>1</sub> | 2.3333   | 0.1979 | H <sub>0</sub> -L <sub>0</sub>                                   | (1.8531, 0.1700, 0.0000)   | 3.4628  |
| S <sub>2</sub> | 3.0929   | 0.0000 | H <sub>3</sub> -L <sub>0</sub><br>H <sub>3</sub> -L <sub>1</sub> | (-0.0000, 0.0000, -0.0103) | 0.0001  |
| S <sub>3</sub> | 3.3799   | 0.3852 | H <sub>0</sub> -L <sub>1</sub>                                   | (-2.1564, 0.0495, -0.0000) | 4.6524  |
| S <sub>4</sub> | 3.5333   | 0.0029 | H <sub>1</sub> -L <sub>0</sub><br>H <sub>0</sub> -L <sub>1</sub> | (-0.0653, 0.1714, 0.0000)  | 0.0336  |
| S <sub>5</sub> | 3.8570   | 0.7706 | H <sub>2</sub> -L <sub>1</sub>                                   | (2.7997, 0.5623, 0.0000)   | 8.1546  |
| S <sub>6</sub> | 4.3019   | 0.0129 | H <sub>3</sub> -L <sub>1</sub>                                   | (0.2509, -0.2436, -0.0000) | 0.1223  |

**Table S13.** Calculated fluorescence represented as  $\Delta E$  in eV, oscillation strengths ( $f$ ), orbital composition and transition dipole moments ( $\mu$ ) and dipole square ( $\mu^2$ ) of low-lying states of compound **3** ( $H_0$ , and  $H_1$  represent HOMO, and HOMO-1 orbitals, respectively.  $L_0$  corresponds to LUMO. Calculations were performed in acetonitrile using PBE functional and 6-311+g(d,p) basis set.

| Excited state  | $E$ (eV) | $f$    | composition                          | $\mu$ (X, Y, Z)          | $\mu^2$ |
|----------------|----------|--------|--------------------------------------|--------------------------|---------|
| S <sub>1</sub> | 1.8632   | 0.1206 | H <sub>0</sub> -L <sub>0</sub> (98%) | (1.6164, 0.1680, 0.0000) | 2.6409  |
| S <sub>3</sub> | 2.7860   | 0.0155 | H <sub>1</sub> -L <sub>0</sub> (99%) | (0.4558, 0.1390, 0.0000) | 0.2271  |

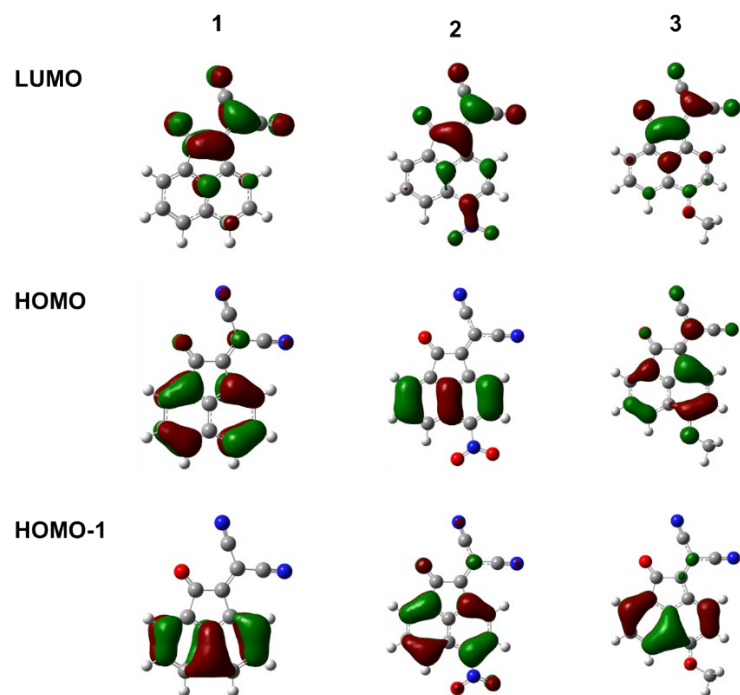

**Figure S34.** Optimized MOs (NTO) of Compounds **1**, **2**, **3** that involved electronic transitions using PBE functional and 6-311+g(d,p) basis set.

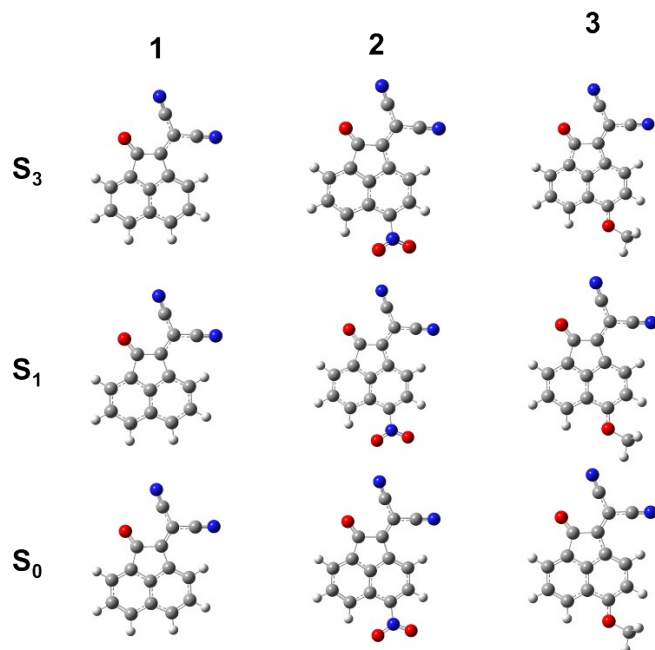

**Figure S35.** Optimized ground and excited states of Compounds **1**, **2**, **3** using PBE functional and 6-311+g(d,p) basis set.

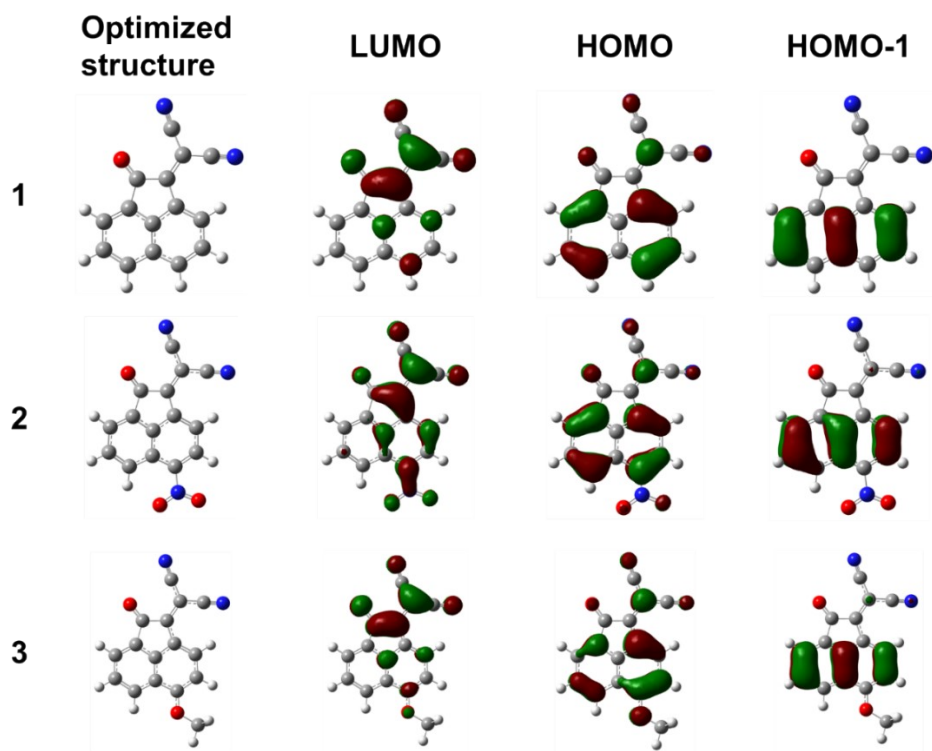

**Figure S36.** Optimized MOs (NTO) of Compounds **1**, **2**, **3** involved in electronic transitions using cam-b3lyp functional and 6-311g(d,p) basis set.

**Table 14.** Calculated fluorescence represented as  $\Delta E$  in eV, oscillation strengths ( $f$ ), orbital composition and transition dipole moments ( $\mu$ ) and dipole square ( $\mu^2$ ) of low-lying state of compound **1** ( $H_0$ , represents HOMO and  $L_0$  corresponds to LUMO). Calculations were performed in acetonitrile using cam-b3lyp functional and 6-311+g(d,p) basis set.

| Excited state | $E$ (eV) | $f$    | composition     | $\mu$ (X, Y, Z)            | $\mu^2$ |
|---------------|----------|--------|-----------------|----------------------------|---------|
| $S_1$         | 2.4455   | 0.1855 | $H_0-L_0$ (98%) | (1.7469, 0.2106, -0.0010,) | 3.0961  |

**Table 15.** Calculated fluorescence represented as  $\Delta E$  in eV, oscillation strengths ( $f$ ), orbital composition and transition dipole moments ( $\mu$ ) and dipole square ( $\mu^2$ ) of low-lying state of compound **2** ( $H_0$ , represents HOMO and  $L_0$  corresponds to LUMO). Calculations were performed in acetonitrile using cam-b3lyp functional and 6-311+g(d,p) basis set.

| Excited state  | $E$ (eV) | $f$    | composition                          | $\mu$ (X, Y, Z)          | $\mu^2$ |
|----------------|----------|--------|--------------------------------------|--------------------------|---------|
| S <sub>1</sub> | 2.5243   | 0.3364 | H <sub>0</sub> -L <sub>0</sub> (99%) | (2.3130, 0.2987, 0.0001) | 5.4392  |

**Table 16.** Calculated fluorescence represented as  $\Delta E$  in eV, oscillation strengths ( $f$ ), orbital composition and transition dipole moments ( $\mu$ ) and dipole square ( $\mu^2$ ) of low-lying state of compound **3** ( $H_0$ , represents HOMO and  $L_0$  corresponds to LUMO). Calculations were performed in acetonitrile using cam-b3lyp functional and 6-311+g(d,p) basis set.

| Excited state  | $E$ (eV) | $f$    | composition                          | $\mu$ (X, Y, Z)           | $\mu^2$ |
|----------------|----------|--------|--------------------------------------|---------------------------|---------|
| S <sub>1</sub> | 2.2264   | 0.2407 | H <sub>0</sub> -L <sub>0</sub> (97%) | (-2.0822, 0.2776, 0.0000) | 4.4127  |

### Compound 1 Gaussian optimization

#### Ground state optimization

opt freq=noraman cam-b3lyp/6-311g(d,p) scrf=(solvent=acetonitrile,pcm)

geom=connectivity scf=(tight,maxcycle=1000)

#### Cartesian coordinates of the structures

```
C      -1.06336600  -0.11301000  -0.00004500
C      -0.45632200  -1.52680100  -0.00005900
O      -1.09108500  -2.54828500  -0.00013000
C       1.23851400   0.05297100   0.00006700
C       2.52079900   0.60517100   0.00013700
C       0.04943400   0.82673400   0.00003900
```

|   |             |             |             |
|---|-------------|-------------|-------------|
| C | 0.15687100  | 2.19702100  | 0.00008500  |
| H | -0.71113800 | 2.84126800  | 0.00006700  |
| C | 2.59533700  | 2.02059400  | 0.00018300  |
| C | 1.44677700  | 2.77631200  | 0.00015700  |
| H | 1.52488300  | 3.85597900  | 0.00019300  |
| H | 3.56371500  | 2.50660300  | 0.00023700  |
| C | 1.00599700  | -1.33133800 | 0.00001100  |
| C | 3.59881100  | -0.31559800 | 0.00015000  |
| C | 2.05788800  | -2.20714100 | 0.00002400  |
| H | 1.90052700  | -3.27845400 | -0.00001800 |
| C | 3.36636800  | -1.67237000 | 0.00009600  |
| H | 4.20847900  | -2.35260000 | 0.00010800  |
| H | 4.61626400  | 0.05720800  | 0.00020400  |
| C | -2.39480200 | 0.10262500  | -0.00010600 |
| C | -2.94135200 | 1.42287600  | -0.00008900 |
| C | -3.36880200 | -0.94717400 | -0.00020000 |
| N | -4.22597400 | -1.71072200 | -0.00027700 |
| N | -3.38073500 | 2.48372700  | -0.00007400 |

### First excited state optimization

```
# opt=calcfc freq=noraman td=(nstates=10,root=1,read) cam-b3lyp/6-311+g(d,p)
scrf=(solvent=acetonitrile,pcm) scf=(tight,maxcycle=1000)
```

### Cartesian coordinates of the structures

|   |             |             |            |
|---|-------------|-------------|------------|
| C | -1.05024800 | -0.17732700 | 0.00000000 |
| C | -0.45960900 | -1.51801600 | 0.00003200 |
| O | -1.02831700 | -2.59799200 | 0.00005400 |
| C | 1.25656900  | 0.05458300  | 0.00001100 |

|   |             |             |             |
|---|-------------|-------------|-------------|
| C | 2.52635200  | 0.63054100  | -0.00001400 |
| C | 0.03155500  | 0.77915700  | -0.00002100 |
| C | 0.12813000  | 2.18641300  | -0.00009400 |
| H | -0.75297100 | 2.81165700  | -0.00013400 |
| C | 2.57999400  | 2.03550300  | -0.00007800 |
| C | 1.38625900  | 2.77500300  | -0.00011700 |
| H | 1.45136100  | 3.85526100  | -0.00017300 |
| H | 3.53289900  | 2.54998600  | -0.00010600 |
| C | 1.02657900  | -1.30957900 | 0.00003900  |
| C | 3.61705400  | -0.26673800 | 0.00001400  |
| C | 2.11291600  | -2.18618500 | 0.00006800  |
| H | 1.96337900  | -3.25839300 | 0.00009800  |
| C | 3.39777200  | -1.64556500 | 0.00005500  |
| H | 4.25138800  | -2.30997800 | 0.00007500  |
| H | 4.63023000  | 0.11583700  | 0.00000300  |
| C | -2.43019900 | 0.09052300  | 0.00000200  |
| C | -2.94250000 | 1.40419200  | 0.00014600  |
| C | -3.41109800 | -0.92915000 | -0.00012000 |
| N | -4.27294300 | -1.69678700 | -0.00022900 |
| N | -3.36518800 | 2.47956400  | 0.00026800  |

## Compound 2 Gaussian optimization

### Ground state optimization

opt freq=noraman cam-b3lyp/6-311g(d,p) scrf=(solvent=acetonitrile,pcm)

geom=connectivity scf=(tight,maxcycle=1000)

### Cartesian coordinates of the structures

|   |             |             |             |
|---|-------------|-------------|-------------|
| C | -2.97723000 | -0.74602200 | -0.00001200 |
| C | 0.12792200  | -1.79202000 | -0.00001300 |
| C | -0.43723000 | -0.54433300 | -0.00001000 |
| C | 0.40637800  | 0.59750600  | -0.00000100 |
| C | 1.80866900  | 0.55275400  | 0.00000400  |
| C | 2.33900900  | -0.77328900 | -0.00000100 |
| C | 1.53235200  | -1.88312200 | -0.00000700 |
| H | -0.45658600 | -2.69996400 | -0.00001900 |
| C | -0.31781700 | 1.80256200  | 0.00000500  |
| H | 2.00265400  | -2.85500700 | -0.00000600 |
| C | 1.73804800  | 2.98553700  | 0.00002600  |
| C | 0.32914800  | 3.00584300  | 0.00001900  |
| H | 2.27533400  | 3.92524800  | 0.00003700  |
| H | -0.21520500 | 3.94149700  | 0.00002300  |
| C | -1.81785400 | -0.06305700 | -0.00000800 |
| C | -1.75386000 | 1.46623400  | -0.00000900 |
| O | -2.70616700 | 2.19939100  | 0.00000700  |
| C | -4.26383100 | -0.11480000 | -0.00001300 |
| N | -5.33647200 | 0.29270500  | -0.00001400 |
| C | -3.01528600 | -2.17529700 | -0.00001700 |
| N | -3.04792500 | -3.32257900 | -0.00002000 |
| N | 3.79089200  | -1.03227400 | -0.00000200 |
| O | 4.16685800  | -2.18770000 | 0.00015300  |
| O | 4.54537100  | -0.07820000 | -0.00012000 |
| C | 2.46194400  | 1.81449000  | 0.00001800  |
| H | 3.53767500  | 1.85741200  | 0.00002400  |

### First excited state optimization

```
# opt=calcfc freq=noraman td=(nstates=10,root=1,read) cam-b3lyp/6-311+g(d,p)
scrf=(solvent=acetonitrile,pcm) scf=(tight,maxcycle=1000)
```

### Cartesian coordinates of the structures

|   |             |             |             |
|---|-------------|-------------|-------------|
| C | -3.01357200 | -0.74276200 | 0.01744900  |
| C | 0.10827700  | -1.79825900 | 0.05491900  |
| C | -0.47700500 | -0.51159500 | 0.02580100  |
| C | 0.42399400  | 0.60651700  | -0.00706200 |
| C | 1.82062000  | 0.53355500  | -0.00781900 |
| C | 2.33575600  | -0.77960100 | 0.01989600  |
| C | 1.48033100  | -1.90120800 | 0.03706900  |
| H | -0.49180600 | -2.69529000 | 0.09073200  |
| C | -0.27455900 | 1.79504600  | -0.03455800 |
| H | 1.94533300  | -2.87607400 | 0.04482200  |
| C | 1.79071700  | 2.98200000  | -0.11650000 |
| C | 0.40165200  | 3.01513800  | -0.09501200 |
| H | 2.34600600  | 3.90852000  | -0.16820800 |
| H | -0.13885400 | 3.95220100  | -0.12825200 |
| C | -1.81098900 | -0.02406600 | 0.01614900  |
| C | -1.73726800 | 1.45836300  | -0.00776500 |
| O | -2.64940200 | 2.25063500  | -0.01966900 |
| C | -4.28219000 | -0.11709600 | 0.05773400  |
| N | -5.34992900 | 0.31776300  | 0.09113700  |
| C | -3.04299700 | -2.15313800 | -0.02554900 |
| N | -3.06522700 | -3.30667900 | -0.05969800 |
| N | 3.76251200  | -1.05293900 | 0.03821600  |

|   |            |             |             |
|---|------------|-------------|-------------|
| O | 4.14798900 | -2.08669500 | -0.48351300 |
| O | 4.50087000 | -0.24744600 | 0.58493400  |
| C | 2.49971400 | 1.78217100  | -0.08011300 |
| H | 3.57729100 | 1.80129800  | -0.10852000 |

### **Compound 3 Gaussian optimization**

#### **Ground state optimization**

opt freq=noraman cam-b3lyp/6-311g(d,p) scrf=(solvent=acetonitrile,pcm)

geom=connectivity scf=(tight,maxcycle=1000)

#### **Cartesian coordinates of the structures**

|   |             |             |             |
|---|-------------|-------------|-------------|
| C | 2.78651100  | -0.76948000 | 0.00008400  |
| C | -0.36420700 | -1.78074200 | -0.00008500 |
| C | 0.25014300  | -0.54778700 | -0.00014100 |
| C | -0.58239600 | 0.60538900  | -0.00015900 |
| C | -1.97239900 | 0.56901900  | -0.00006300 |
| C | -2.57079200 | -0.72978000 | -0.00003700 |
| C | -1.76849100 | -1.86101200 | -0.00005600 |
| H | 0.20328400  | -2.70121300 | -0.00004900 |
| C | 0.13589200  | 1.80934000  | -0.00020000 |
| C | -2.64615200 | 1.81200500  | 0.00002400  |
| H | -2.22186800 | -2.84111100 | -0.00001600 |
| C | -1.93490900 | 2.99219400  | 0.00004900  |
| C | -0.52343400 | 3.01003900  | -0.00004700 |
| H | -3.72800900 | 1.82877600  | 0.00010700  |
| H | -2.47133300 | 3.93232200  | 0.00013100  |
| H | 0.01590400  | 3.94913200  | -0.00007100 |
| C | 1.61874300  | -0.08452700 | -0.00009400 |

|   |             |             |             |
|---|-------------|-------------|-------------|
| C | 1.56956200  | 1.45493800  | -0.00048600 |
| O | 2.53181500  | 2.17610000  | 0.00006400  |
| C | 4.07381800  | -0.14696000 | 0.00002400  |
| N | 5.14894600  | 0.25705600  | -0.00003800 |
| C | 2.80980900  | -2.19620100 | 0.00031800  |
| N | 2.82146300  | -3.34504600 | 0.00052100  |
| O | -3.90498600 | -0.74209800 | 0.00003100  |
| C | -4.59202100 | -1.99316400 | 0.00010200  |
| H | -4.34685800 | -2.56832000 | 0.89480200  |
| H | -5.64968500 | -1.74693800 | 0.00017900  |
| H | -4.34699400 | -2.56834700 | -0.89461900 |

#### First excited state optimization

```
# opt=calcfc freq=noraman td=(nstates=10,root=1,read) cam-b3lyp/6-311+g(d,p)
scrf=(solvent=acetonitrile,pcm) scf=(tight,maxcycle=1000)
```

#### Cartesian coordinates of the structures

|   |             |             |             |
|---|-------------|-------------|-------------|
| C | 2.79874500  | -0.77828500 | 0.00001100  |
| C | -0.35585400 | -1.76788000 | 0.00005600  |
| C | 0.25828800  | -0.49806800 | 0.00001600  |
| C | -0.60020700 | 0.62683300  | -0.00001500 |
| C | -1.99023800 | 0.58219900  | -0.00001100 |
| C | -2.57780700 | -0.72724000 | 0.00002900  |
| C | -1.73510200 | -1.86570700 | 0.00006200  |
| H | 0.23019700  | -2.67593100 | 0.00008200  |
| C | 0.13300200  | 1.81270500  | -0.00005000 |
| C | -2.66518900 | 1.80714800  | -0.00004500 |
| H | -2.18114100 | -2.84915400 | 0.00009200  |

|   |             |             |             |
|---|-------------|-------------|-------------|
| C | -1.93921600 | 3.00120600  | -0.00008000 |
| C | -0.54321300 | 3.02325100  | -0.00008400 |
| H | -3.74681500 | 1.83193600  | -0.00004300 |
| H | -2.48166700 | 3.93765700  | -0.00010600 |
| H | -0.00671500 | 3.96378100  | -0.00011300 |
| C | 1.62713800  | -0.01002800 | -0.00000300 |
| C | 1.58054600  | 1.45053300  | -0.00004400 |
| O | 2.52492600  | 2.23455600  | -0.00006500 |
| C | 4.09374100  | -0.20409800 | 0.00000300  |
| N | 5.18286300  | 0.17702300  | -0.00000100 |
| C | 2.77837300  | -2.18932300 | 0.00003700  |
| N | 2.76526800  | -3.34470000 | 0.00005700  |
| O | -3.88510400 | -0.78040000 | 0.00003400  |
| C | -4.57716400 | -2.04152100 | 0.00007000  |
| H | -4.32654000 | -2.60599100 | 0.89767900  |
| H | -5.63132900 | -1.78610900 | 0.00006300  |
| H | -4.32654000 | -2.60604300 | -0.89750700 |

## Reference

---

i L. Wanga, X. Wanga, J. Cuia, W. Rena, N. Menga, J. Wanga and X. Qian, *Tetrahedron:Asymmetry*, 2010, **21**, 825–830
